# Supplementary material for: Development and validation of an instrument for measuring the burden of medicine on functioning and well-being: the Medication-Related Burden Quality of Life (MRB-QoL) tool
Source: PubMed Central journal article supplement — BMJ Open. 2018 Jan 11;8(1):e018880. doi: 10.1136/bmjopen-2017-018880 (PMC5781060; doi:10.1136/bmjopen-2017-018880), 2018-01-11
Supplement: bmjopen-2017-018880.draft_revisions.pdf [file bmjopen-2017-018880.draft_revisions.pdf]

# BMJ Open

BMJ Open is committed to open peer review. As part of this commitment we make the peer review history of every article we publish publicly available.

When an article is published we post the peer reviewers' comments and the authors' responses online. We also post the versions of the paper that were used during peer review. These are the versions that the peer review comments apply to.

The versions of the paper that follow are the versions that were submitted during the peer review process. They are not the versions of record or the final published versions. They should not be cited or distributed as the published version of this manuscript.

BMJ Open is an open access journal and the full, final, typeset and author-corrected version of record of the manuscript is available on our site with no access controls, subscription charges or pay-per-view fees (<http://bmjopen.bmj.com>).

If you have any questions on BMJ Open's open peer review process please email [editorial.bmjopen@bmj.com](mailto:editorial.bmjopen@bmj.com)

# BMJ Open

## Development and validation of an instrument for measuring the burden of medicine on functioning and well-being: the Medication-Related Burden Quality of Life (MRB-QoL) tool

|                                 |                                                                                                                                                                                                                                                          |
|---------------------------------|----------------------------------------------------------------------------------------------------------------------------------------------------------------------------------------------------------------------------------------------------------|
| Journal:                        | <i>BMJ Open</i>                                                                                                                                                                                                                                          |
| Manuscript ID                   | bmjopen-2017-018880                                                                                                                                                                                                                                      |
| Article Type:                   | Research                                                                                                                                                                                                                                                 |
| Date Submitted by the Author:   | 28-Jul-2017                                                                                                                                                                                                                                              |
| Complete List of Authors:       | Mohammed, Mohammed; The University of Sydney, Moles, Rebekah; The University of Sydney, Faculty of Pharmacy Hilmer, Sarah; University of Sydney, Royal North Shore Hospital Kouladjian O'Donnell, Lisa Chen, Timothy; Pharmacy, The University of Sydney |
| <b>Primary Subject Heading</b>: | Health services research                                                                                                                                                                                                                                 |
| Secondary Subject Heading:      | Health services research, General practice / Family practice, Patient-centred medicine, Pharmacology and therapeutics                                                                                                                                    |
| Keywords:                       | THERAPEUTICS, GENERAL MEDICINE (see Internal Medicine), Health & safety < HEALTH SERVICES ADMINISTRATION & MANAGEMENT                                                                                                                                    |
|                                 |                                                                                                                                                                                                                                                          |

SCHOLARONE™  
Manuscripts

1  
2  
3 **Development and validation of an instrument for measuring the burden of medicine on**  
4 **functioning and well-being: the Medication-Related Burden Quality of Life (MRB-QoL)**  
5 **tool**  
6  
7

8  
9 Mohammed A Mohammed <sup>\*1</sup>, Rebekah J Moles<sup>1</sup>, Sarah N Hilmer<sup>2,3</sup>, Lisa K O'Donnel <sup>2,3</sup>,  
10 Timothy F Chen<sup>1</sup>  
11

12  
13  
14  
15  
16 Mohammed A Mohammed

17  
18  
19 B.Pharm, M.Pharm (Clinical), PhD Candidate

20  
21  
22 <sup>1</sup>Faculty of Pharmacy, University of Sydney, New South Wales, Australia

23  
24 Email: [mmoh2116@uni.sydney.edu.au](mailto:mmoh2116@uni.sydney.edu.au)  
25  
26

27  
28  
29 Rebekah J Moles

30  
31  
32 DipHPharm, B.Pharm, PhD

33  
34 Associate Professor

35  
36  
37 <sup>1</sup>Faculty of Pharmacy, University of Sydney, New South Wales, Australia

38  
39 Email: [Rebekah.moles@sydney.edu.au](mailto:Rebekah.moles@sydney.edu.au)  
40  
41

42  
43  
44 Sarah N Hilmer

45  
46  
47 MD, PhD

48  
49  
50 Staff Specialist and Professor of Geriatric Pharmacology

51  
52  
53 <sup>2</sup>Department of Clinical Pharmacology and Aged Care, Royal North Shore Hospital, Kolling  
54 Institute of Medical Research, Sydney, Australia.  
55  
56

1  
2  
3 <sup>3</sup>Cognitive Decline Partnership Centre, Sydney Medical School, University of Sydney, Sydney,  
4  
5 Australia  
6  
7  
8  
9

10 Lisa K O'Donnel

11  
12 B.MedSc(Hons), M.Pharm, PhD

13  
14  
15 Postdoctoral Fellow  
16  
17

18 <sup>2</sup>Department of Clinical Pharmacology and Aged Care, Royal North Shore Hospital, Kolling  
19  
20 Institute of Medical Research, Sydney, Australia.  
21

22 <sup>3</sup>Cognitive Decline Partnership Centre, Sydney Medical School, University of Sydney, Sydney,  
23  
24 Australia  
25

26  
27 Email: [lisa.kouladjian@sydney.edu.au](mailto:lisa.kouladjian@sydney.edu.au)  
28  
29

30  
31  
32 Timothy F Chen

33  
34  
35 PhD, DipHPharm, B.Pharm

36  
37  
38 Associate Professor  
39

40 <sup>1</sup>Faculty of Pharmacy, University of Sydney, New South Wales, Australia  
41

42  
43 Email: [timothy.chen@sydney.edu.au](mailto:timothy.chen@sydney.edu.au)  
44  
45

46  
47 **Correspondence\*:**

48  
49 Mohammed A Mohammed

50  
51 The University of Sydney, Faculty of Pharmacy, A15 Science Rd, Sydney, Australia

52  
53 Tell: +6193517114  
54

55  
56 Email: [mmoh2116@uni.sydney.edu.au](mailto:mmoh2116@uni.sydney.edu.au)  
57  
58  
59  
60

## Abstract

**Objective:** Medication-Related Burden (MRB) is a negative experience with medicine, which may impact on psychological, social, physical, and financial well-being of an individual. This study describes the development and initial validation of an instrument specifically designed to measure medication-related burden on functioning and well-being- the Medication-Related Burden Quality of Life (MRB-QoL) tool.

**Methods:** An initial item pool of 76-items for MRB-QoL was generated. The link to MRB-QoL survey was sent to consumers living with at least one chronic medical condition and taking three or more prescription medicines on a regular basis. Exploratory Factor Analysis (EFA) was used to determine the underlining factor structure. Internal consistency (Chronbach's alpha) and construct validity were examined. The latter were examined through correlation with Medication Regimen Complexity Index (MRCI), Drug Burden Index (DBI) and Charlson's comorbidity index (CCI).

**Results:** 367 consumers completed the survey (51.2% male). EFA resulted in a 31-item, five-factor solution explaining 72% of the total variance. The five-subcales were labeled as "Routine and Regimen Complexity" (11 items), "Psychological Burden" (6 items), "Functional and Role limitation" (7 items), "Therapeutic Relationship" (3 items) and "Social Burden" (4 items). All sub-scales showed good internal consistency (Cronbach's  $\alpha$  0.87 to 0.95). Discriminant validity of MRB-QoL was demonstrated via its correlations with MRCI (Spearman's  $r$  -0.16 to 0.08), DBI ( $r$  0.12 to 0.28) and CCI ( $r$  -0.23 to -0.15). Correlation between DBI and "Functional and Role limitation" sub-scale ( $r$  0.36) indicated some evidence of convergent validity. Patients with polypharmacy, multiple morbidity, and DBI >0 had higher median scores of MRB-QoL providing evidence for known group validity.

**Conclusions:** The MRB-QoL V.1 has good construct validity and internal consistency. The MRB-QoL may be a useful humanistic measure for evaluating the impact of pharmaceutical care interventions on patients' quality of life. Future research is warranted to further examine additional psychometric properties of MRB-QoL V.1 and its utility in patient care.

### Strengths and Limitations of this study

- This study described the development and validation of the MRB-QoL tool based on robust methods and highlighted its potential application for research and practice.
- MRB-QoL V.1 has good construct validity and internal consistency.
- The MRB-QoL can be used to facilitate evaluation of humanistic outcome in pharmaceutical care interventions.
- Validation of a patient-reported measure cannot be completed in a single study thus; MRB-QoL requires further validation such as confirmatory factor analysis, test-retest reliability, sensitivity and responsiveness.

## Introduction

Medicines represent the most common form of therapy in the management of chronic medical conditions<sup>1</sup>. Clinical management of various chronic medical conditions often requires prescribing of multiple medicines especially in people with multi-morbidity<sup>2</sup>. Although medicines usually improve patient health outcomes, for some patients long term use of multiple medicines may become burdensome<sup>1</sup> and have negative consequences<sup>3</sup>. Patients often experience medication related burden because of the routines associated with taking medicines, adverse events, nature of medicines (eg. inconvenience or complexity of the regimen), challenges associated with the health care system (eg. access to medicines) and interference with social activities<sup>1</sup>. The encountered medication-related burden can adversely affect the social, psychological and physical wellbeing of an individual<sup>1 3-5</sup>. Patients experiencing medication related burden often report poor health related quality of life (HRQoL)<sup>1 5 6</sup>.

Improving a patient's HRQoL outcome is an ultimate goal of 'pharmaceutical care' (PC) services<sup>7</sup> such as medication-therapy management. The social, psychological and physical impact of drug therapy on patients' lives is a critical humanistic dimension that should be evaluated in all PC interventions<sup>8</sup>. However, it is not known how the core elements of PC interventions (i.e identification and resolution of drug related problems) is linked to changes in humanistic outcomes<sup>9</sup>. Thus; demonstrating the full picture of the benefit of PC services in improving patients' HRQoL outcomes remains challenging. Existing evidence is inconclusive and conflicting<sup>10-21</sup>. The lack of sensitivity and specificity of existing HRQoL measures to capture the humanistic outcome aspects related to the impact of drug therapy may be a contributing factor<sup>8 17 22 23</sup>.

Over the last three decades, outcomes of HRQoL in PC research have been evaluated using generic and or disease specific HRQoL measures<sup>17 23-25</sup>. These measures however, have been developed to evaluate the impact of disease burden on patients' life not specifically the impact of drug therapy<sup>17 23</sup>. Our recent systematic review and content analysis showed that out of the total 1019 items identified from 37 HRQoL measures used in PC studies published between 1990 and 2015, only 34 items were specifically about medicines<sup>23</sup>. This review further highlighted that items about medicines did not appear to have been focused on the burden of medicines on functioning and well-being. This implies that existing HRQoL measures lack specificity to PC services and sensitivity to detect changes in HRQoL caused by the burden of medicines.

1  
2  
3 Other widely used measures of medication burden such as Drug Burden Index (DBI)<sup>26</sup> and  
4 Medication Regimen Complexity Index (MRCI)<sup>27</sup> are useful objective measures of the burden  
5 of medicines. However, neither is a patient-reported and a humanistic measure. There is  
6 currently no validated measure of Medication-Related Burden on quality of life. This study  
7 reports on the development and preliminary validation of an instrument specifically designed to  
8 measure the burden of medicine on functioning and well-being from the patient's perspective.  
9  
10  
11  
12  
13  
14  
15  
16  
17  
18  
19  
20  
21  
22  
23  
24  
25  
26  
27  
28  
29  
30  
31  
32  
33  
34  
35  
36  
37  
38  
39  
40  
41  
42  
43  
44  
45  
46  
47  
48  
49  
50  
51  
52  
53  
54  
55  
56  
57  
58  
59  
60

For peer review only



## Methods

### Development of the MRB-QoL tool

The MRB-QoL tool was developed in three phases (Figure 1). Phase I involved: conceptualization of the area through meta-synthesis of Medication-Related Burden and patients' lived experience with medicines<sup>1</sup>, meta-analysis of Pharmaceutical Care (PC) impact on HRQoL<sup>17</sup>, content analysis of HRQoL measures used in PC studies<sup>23</sup>. Phase II involved: the generation and refinement of an item pool. Phase III involved: the psychometric testing of the items using responses from a sample of Australian health and medicines consumers.

**Figure 1: Development and validation process of the MRB-QoL tool**

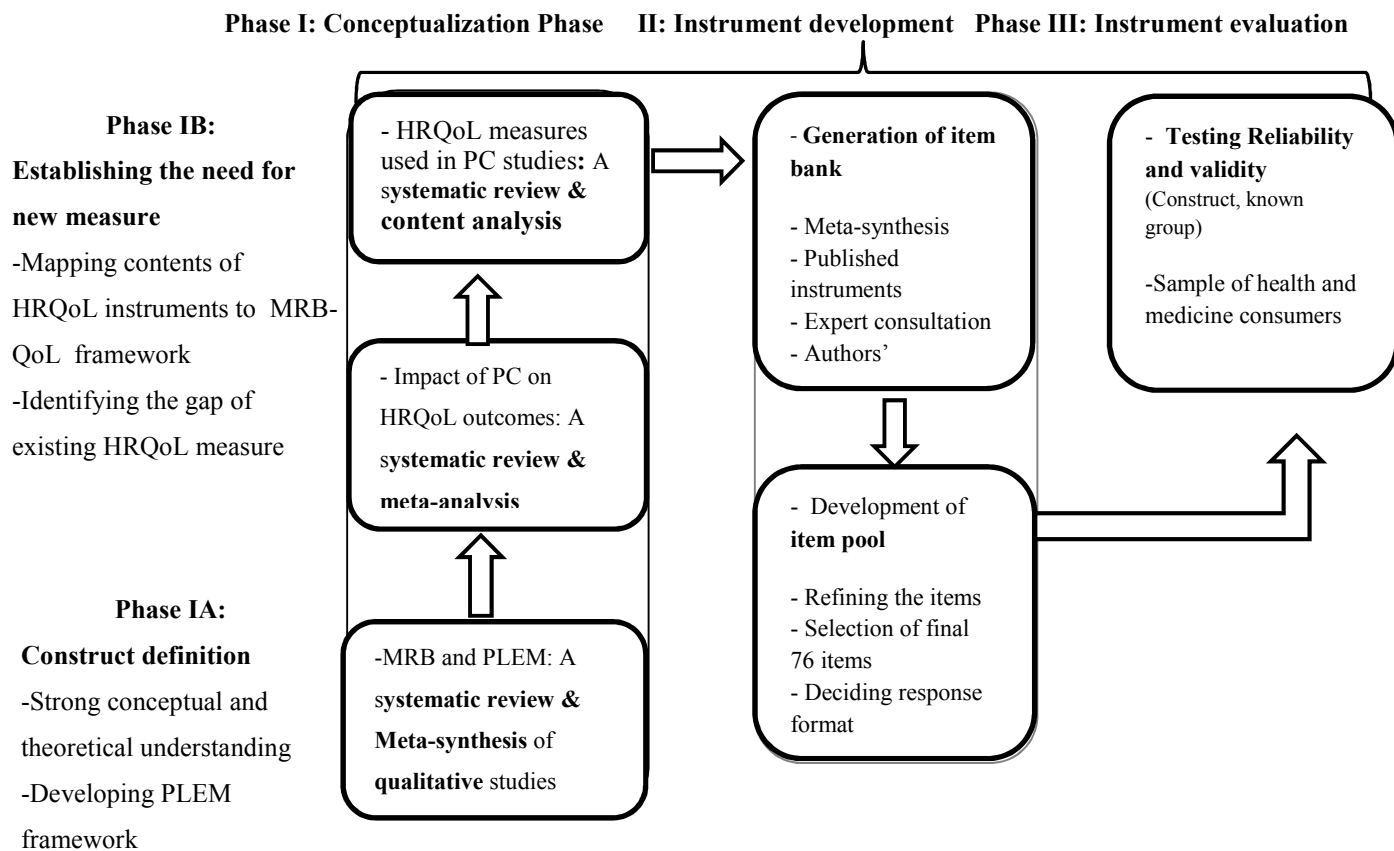

**Abbreviations:** HRQoL= Health Related Quality of Life; PLEM= Patients' Lived Experience with Medicine; MRB-QoL= Medication Related Burden for Quality of Life; PC= Pharmaceutical Care

## Item pool

Meta-synthesis of 34 qualitative studies about patients' lived experience with medicine provided a core foundation for item generation<sup>1</sup>. Over 966 quotes of patients were identified through meta-synthesis and used as a source to generate an item bank. We believed that generation of a pool of items via this approach was advantageous in establishing a strong conceptual foundation and theoretical understanding, when compared to traditional methods of item generation based on an interview with a single cohort of participants. It was anticipated that this approach may be more comprehensive in generating a pool of items covering a wide range of medicine-associated burden across multiple chronic illnesses. We used Nvivo 10 (QRS International, Victoria) Software to facilitate coding and analysis of participants' quotes<sup>1</sup>. Following analyses of coded data, a pool of 76 items representing relevant medicine associated burden were generated. A theoretical conceptual framework of MRB-QoL (see supplementary file) was used to guide the item development process. The framework was developed based on the themes of MRB identified in our meta-synthesis<sup>1</sup>, recommended domains of HRQoL in evaluation of pharmaceutical care (PC) services<sup>8 17</sup> and conceptual gaps in the HRQoL measures used in PC interventions<sup>3 23</sup>. Quality of life instruments specifically designed to evaluate PC services should encompass at least physical, social and psychological domains<sup>8 17</sup>. Several existing HRQoL measures used in the evaluation of PC interventions encompass these three domains, however, the domains lack items about the burden of medicine on health and well-being<sup>1 17 23</sup>. In light of this, items of MRB-QoL were designed in a way to typically focus on medication burden ranging from the hassles of dealing with routines to the burden on social, psychological, physical and financial well-being.

## Study sample and data collection

A consumer panel fulfilling the inclusion criteria was recruited via an Australian market research company, the Survey Sampling International (SSI). Consumers had to be 18 years or older, taking  $\geq 3$  prescription medicine on a regular basis and living with at least one medical condition. The estimated sample size (n= 380) was calculated using 5:1 ratio i.e five participants per item<sup>28 29</sup>. The market research company distributed a survey monkey link to the MRB-QoL to potential participants. Screening questions were used to allow only eligible participants (based on age, number of medicines and medical conditions) to complete the survey. Eligible

1  
2  
3 participants were asked to indicate on a 5 point Likert scale the extent to which they agreed or  
4 disagreed with each statement of MRB-QoL tool where, '1 = strongly agree', '2= agree', '3=  
5 neither agree nor disagree', '4= disagree', and '5= strongly disagree'. In addition, 'prefer not to  
6 answer' was included as an alternative option to respect participants' choice of not responding to  
7 a given item. A two-week recall period was used to help participants recall relevant experience  
8 associated with specific aspects of medicine burden eg., "*considering the impact of your*  
9 *medicine on your physical wellbeing during the past two weeks, indicate how much you agree or*  
10 *disagree with the following statement?*". The survey also had an open ended section for  
11 participants to document names of medical conditions and, names of medicines, their strengths  
12 and directions for use. Participants were asked to complete sections about medicines (prescribed  
13 by doctors and obtained over the counter) only when they were at home and had complete access  
14 to their medicines.  
15  
16  
17  
18  
19  
20  
21  
22  
23  
24

## 25 **Data Analyses**

26  
27 Characteristics of study participants were summarized using descriptive statistics. Tests for  
28 normality (Shapiro wilk test, Q-Q plot, Box plot, Histogram, skewness and kurtosis) showed that  
29 the analyzed variables were not normally distributed. Hence, continuous variables were  
30 summarized using medians and range whereas categorical variables were reported using  
31 frequencies and percentages. Exploratory Factor Analysis (EFA) using oblique rotation was  
32 conducted to determine the factor structure underlying MRB-QoL. An oblique method of factor  
33 rotation was chosen because of expected correlation among the factors<sup>30 31</sup>. Before factor  
34 analysis, suitability of the data for factor analysis was checked using Kaiser-Mayer Olkin (KMO)  
35 measure of sampling adequacy (value >0.8), Bartlett's Test of Sphericity (p <0.01) and  
36 inspection of the correlation matrix for coefficients  $\geq 0.3$ <sup>28</sup>. An initial factor solution was  
37 determined by visual inspection of scree plots and Eigen values >1. Final items were retained  
38 based on factor loadings (>0.3), no cross loadings on two or more factors (> 0.3), item-total  
39 correlations and interpretability with regard to extracted factors. Cronbach's alpha coefficient  
40 was used to assess internal consistency reliability<sup>32</sup>. Testing convergent (moderate to high  
41 correlations ie  $r > 0.3$ )<sup>33</sup> and discriminant (weak correlations ie  $r \leq 0.3$ ) validity of MRB-QoL in  
42 relation to DBI (measure of exposure to medicines with anticholinergic and sedative effects),  
43 MRCI (measure of complexity of medicine regimen) and Charlson's Comorbidity Index/CCI  
44 (measure of disease burden) was planned where data were available (i.e detailed information  
45  
46  
47  
48  
49  
50  
51  
52  
53  
54  
55  
56  
57  
58  
59  
60

1  
2  
3 about name of medicine, strengths and directions for use and detailed information on diagnoses).  
4 We hypothesized that domains of MRB-QoL would be positively correlated with DBI, MRCI  
5 and CCI, but the MRB-QoL is a separate concept from all the three indices. Similarly, with an a  
6 priori assumption that patients on polypharmacy ( $\geq 5$  different medicines)<sup>34</sup>, with multimorbidity  
7 ( $\geq 3$  different medical conditions) and DBI $>0$  may have poorer MRB-QoL, we planned to test  
8 known group validity of the MRB-QoL if sufficient data were available for these variables.  
9 MRCI was calculated as the sum of scores of dosage forms used, dosage frequency and  
10 additional instructions<sup>27</sup>. DBI for each participant was calculated as the sum of exposure to each  
11 medicine with anticholinergic or sedative effects<sup>26</sup> taking into account the total daily dose and  
12 the recommended minimum daily dose by the Therapeutic Goods Administration of Australia<sup>35</sup>  
13<sup>36</sup>. Australian approved lists of medicines were used to define medicines with clinically  
14 significant anticholinergic and sedating effects. A conversion formula to transform scores of  
15 MRB-QoL scales into a single overall index or total score has been proposed (See Appendix I).  
16 Data were analyzed using SPSS Statistics version 22 for windows.  
17  
18  
19  
20  
21  
22  
23  
24  
25  
26  
27  
28  
29  
30  
31

## 32 Results

33 Three-hundred and sixty-seven participants completed the survey and 51.2 % of respondents  
34 were male. The median number of prescription medicines and medical condition were 5 and 3  
35 respectively. Most of the respondents were on five or more medicines (n=200) and living with 3  
36 or more medical conditions (n=195). Exposure to DBI $>0$  was 52.9% (n=148) with a median of  
37 0.9. Older people ( $\geq 65$  years) accounted for 60.6% and 47.3% of patients with DBI 0 (n=132)  
38 and DBI $>0$  (n=148) respectively. Detailed characteristics of survey respondents are presented in  
39 Table 1.  
40  
41  
42  
43  
44  
45  
46  
47  
48  
49  
50  
51  
52  
53  
54  
55  
56  
57  
58  
59  
60

Table 1: Characteristics of survey respondents

| Variable                                                                                                                        |               |
|---------------------------------------------------------------------------------------------------------------------------------|---------------|
| Age in years (IQR)                                                                                                              | 64 (49-70)    |
| Male gender, n (%)                                                                                                              | 188 (51.2)    |
| Number of medical conditions (IQR)                                                                                              | 3 (2-3)       |
| Number of prescription medicines (IQR)                                                                                          | 5 (3-7)       |
| Number of over the counter medicines (IQR)                                                                                      | 2 (1-3)       |
| CCI (IQR)                                                                                                                       | 3 (0-4)       |
| MRCI (IQR)                                                                                                                      | 9 (7-13)      |
| Total DBI (IQR)                                                                                                                 | 0.5 (0-0.9)   |
| DBI>0 (IQR)                                                                                                                     | 0.9 (0.7-1.6) |
| Age <65 years, median (IQR)                                                                                                     | 1.2 (1.01)    |
| Age ≥65 years median (IQR)                                                                                                      | 0.7 (0.8)     |
| DBI categories                                                                                                                  |               |
| DBI 0, n (%)                                                                                                                    | 132 (47.1)    |
| DBI 0-1, n (%)                                                                                                                  | 81 (28.9)     |
| DBI >1, n (%)                                                                                                                   | 67 (23.9)     |
| DBI= Drug Burden Index, CCI= Charlson's Comorbidity Index, IQR= Inter Quartile Range, MRCI= Medication Regimen Complexity Index |               |

### Factor analysis and scales of MRB-QoL measure

No item had > 5% missing data. After removing items with low loadings and cross loadings, Exploratory Factor Analysis (EFA) resulted in 31-item, five-factor solution which explained 72.1 % of the total variance. Based on the items that constituted each factor, the factors were interpreted as Factor 1: "Routine and Regimen Complexity" (items 1-11), Factor 2: "Psychological Burden" (items 12-17), Factor 3: "Functional and Role limitation" (items 18-24), Factor 4: "Therapeutic Relationship" (items 25-27), Factor 5: "Social Burden" (items 28-31) (Table 2). The correlation between factors ranged from 0.33 to 0.57. In this paper, sub-scales

are used referring to factors. All items of each sub-scale were reverse coded such that the higher scores reflected higher level of the scale's characteristic (i.e. higher burden of medicine and poorer quality of life).

Table 2: Factor structure and loadings of the MRB-QoL items

| No | Items                                      | Factors     |             |             |             |              |
|----|--------------------------------------------|-------------|-------------|-------------|-------------|--------------|
|    |                                            | F1          | F2          | F3          | F4          | F5           |
| 1  | Organizing medicine routines (RRC-1)       | <b>.934</b> | -.056       | -.018       | -.083       | -.026        |
| 2  | Keeping medicine record (RRC-2)            | <b>.913</b> | -.007       | -.053       | -.069       | -.046        |
| 3  | Routine-managing (RRC-3)                   | <b>.841</b> | .066        | -.038       | -.021       | -.052        |
| 4  | Fitting medicine routines (RRC-4)          | <b>.838</b> | -.011       | .051        | -.077       | -.070        |
| 5  | Interference with daily activities (RRC-5) | <b>.705</b> | .065        | .082        | .132        | .020         |
| 6  | Balancing-interference (RRC-6)             | <b>.684</b> | .049        | .038        | .190        | -.010        |
| 7  | Simplicity of medicine regimen (RRC-7)     | <b>.671</b> | .021        | .053        | .095        | -.110        |
| 8  | Medicine-instructions (RRC-8)              | <b>.656</b> | .057        | .052        | .125        | -.020        |
| 9  | Regimen-convenience (RRC-9)                | <b>.651</b> | .030        | -.005       | .023        | -.207        |
| 10 | Medicine and daily life schedules (RRC-10) | <b>.651</b> | -.015       | .107        | .171        | -.024        |
| 11 | Medicine-package (RRC-11)                  | <b>.535</b> | .050        | .087        | .131        | .141         |
| 12 | Long term-medicine (PsyB-1)                | -.023       | <b>.854</b> | .011        | -.082       | -.154        |
| 13 | Number of medicine (PsyB-2)                | .080        | <b>.832</b> | -.066       | .132        | .086         |
| 14 | Long term- impact (PsyB-3)                 | -.092       | <b>.795</b> | .054        | .043        | -.067        |
| 15 | Medicine reminds health condition (PsyB-4) | .018        | <b>.766</b> | .017        | .002        | -.109        |
| 16 | Medicine-interactions (PsyB-5)             | .145        | <b>.744</b> | .024        | .153        | .174         |
| 17 | Medicine-signifies problem (PsyB-6)        | .021        | <b>.614</b> | .184        | -.119       | -.176        |
| 18 | Sexual relationship (FRL-1)                | -.075       | -.125       | <b>.913</b> | .093        | -.053        |
| 19 | Sexual activity (FRL-2)                    | -.065       | -.069       | <b>.908</b> | .027        | -.014        |
| 20 | Medicine and physical health (FRL-3)       | .052        | .205        | <b>.670</b> | -.029       | -.104        |
| 21 | Medicine and night-sleep (FRL-4)           | .101        | .104        | <b>.658</b> | .070        | .003         |
| 22 | Medicine and physical activities (FRL-5)   | .094        | .244        | <b>.613</b> | -.002       | .052         |
| 23 | Medicine- impact on work (FRL-6)           | .265        | .036        | <b>.609</b> | .019        | -.064        |
| 24 | Comfort and side effect (FRL-7)            | .259        | .226        | <b>.533</b> | -.104       | .025         |
| 25 | Respect and dignity (TR-1)                 | .005        | -.019       | .067        | <b>.826</b> | -.085        |
| 26 | Decisions and considerations (TR-2)        | .012        | .104        | .021        | <b>.804</b> | -.088        |
| 27 | Decisions and engagement (TR-3)            | .108        | .036        | .037        | <b>.757</b> | -.049        |
| 28 | Lived experience with others (SB-1)        | .035        | .148        | .084        | .079        | <b>-.720</b> |
| 29 | Public-perception (SB-2)                   | .147        | .087        | -.009       | .097        | <b>-.719</b> |
| 30 | People and stigma (SB-3)                   | .193        | .044        | .139        | .113        | <b>-.620</b> |
| 31 | Self-stigma (SB-4)                         | .190        | .027        | .069        | .213        | <b>-.576</b> |
| 32 | <b>Eigen value</b>                         | 16.44       | 2.16        | 1.58        | 1.11        | 1.05         |
| 33 | <b>Variance explained</b>                  | 53.05       | 6.97        | 5.10        | 3.61        | 3.39         |

1  
2  
3 **F1**= Routine and Regimen Complexity (RRC), **F2**= Psychological Burden(PsyB), **F3**= Functional and Role  
4 limitation(FRL), **F4**= Therapeutic Relationship(TR), **F5**=Social Burden(SB)  
5  
6  
7

### 8 **Reliability and characteristics of MRB-QoL**

9  
10 Internal consistency of the MRB-QoL sub-scales ranged from 0.87 to 0.95 indicating that all sub-  
11 scales had good internal consistency reliability<sup>37</sup>. There was no strong evidence of ceiling and  
12 floor effects except for the “Therapeutic Relationship” sub-scale which had a slightly higher  
13 ceiling and the “Social Burden” sub-scale which showed a slightly higher floor effect (Table 3).  
14  
15  
16  
17  
18

19 Table 3: Descriptive statistics and reliabilities for sub-scales of MRB-QoL measure

| 20 <b>MRB-QoL</b>            | 21 <b>N</b> | 22 <b>Factor-based score</b> | 23 <b>Score range</b> | 24 <b>Cronbach's <math>\alpha</math></b> | 25 <b>% Floor</b> | 26 <b>% Ceiling</b> |
|------------------------------|-------------|------------------------------|-----------------------|------------------------------------------|-------------------|---------------------|
| 27 <b>sub-scales (items)</b> |             | 28 <b>(IQR)</b>              |                       |                                          |                   |                     |
| 29 <b>RRC (11 items)</b>     | 363         | 24 (15-33)                   | 11-55                 | 0.95                                     | 0.6               | 13.2                |
| 30 <b>PsyB (6 items)</b>     | 363         | 21 (16-24)                   | 6-30                  | 0.91                                     | 2.8               | 3.3                 |
| 31 <b>FR (7 items)</b>       | 351         | 19 (14-24)                   | 7-35                  | 0.92                                     | 1.1               | 6.0                 |
| 32 <b>TR (3 items)</b>       | 367         | 6 (4-9)                      | 3-15                  | 0.87                                     | 1.4               | 24.8                |
| 33 <b>SB (4 items)</b>       | 358         | 9 (6-13)                     | 4-20                  | 0.91                                     | 19.0              | 1.7                 |

34 **RRC** = Routine and Regimen Complexity, **PsyB**= Psychological Burden, **FR**= Functional and Role  
35 limitation, **TR**= Therapeutic Relationship, **SB**=Social Burden, **N**= number of respondents, **IQR**=  
36 Interquartile Range  
37  
38  
39

### 40 **Construct validity**

41  
42 Moderate to high inter-item correlations (range 0.41-0.85) and correlations of items with their  
43 own sub-scales (corrected item-total correlation 0.56-0.93) provided good evidence of internal  
44 construct validity of all MRB-QoL sub-scales.  
45  
46

47 Both number of medicines and medical conditions were significantly correlated with all sub-  
48 scales of MRB-QoL except in the “social burden” sub-scale (Table 4). Item 13, which pertained  
49 to the number of medicines, was found to have moderate to high correlations (0.48-0.81) with all  
50 sub-scales of MRB-QoL (data not shown). There were weak correlations between Medication  
51 Regimen Complexity Index (MRCI) and all sub-scales of MRB-QoL indicating that MRCI and  
52 sub-scales of MRB-QoL are separate constructs of measures of medication burden (Table 4).  
53  
54  
55  
56  
57  
58  
59  
60

“Therapeutic Relationship” and “Social Burden” sub-scales of MRB-QoL were inversely correlated with MRCI ( $r = -0.16$  vs  $0.09$ ).

Drug Burden Index score was significantly and positively correlated with all sub-scales of MRB-QoL (Table 4). Moderate correlation between DBI and the “Functional and role limitation” sub-scale of MRB-QoL provided some evidence of convergent validity, indicating that both DBI and this sub-scale measure the burden of medicine on functional outcomes. However, the weak magnitude of correlations across the remaining sub-scales of MRB-QoL (spearman rho 0.12 to 0.28) demonstrated discriminant validity, indicating that these sub-scales measure dimensions of medication burden different from that of DBI. The inclusion of ‘PRN’ or ‘as needed’ medicines did not show significant differences both in the magnitude and direction of correlations (spearman rho 0.18 to 0.34). Furthermore, we intended to quantify patient level medication burden by incorporating all the medicines in objective measures (i.e DBI, MRCI) and compare them with patient self-rated MRB-QoL scores. Hence, in this study PRN medicines (excluding vitamins and herbal medicines) were included in the DBI calculation. Statistically significant but weak and inverse correlations were found between CCI and all sub-scales of MRB-QoL indicating discriminant validity (Table 4).

Table 4: Construct validity of MRB-QoL sub-scales

| MRB-QoL sub-scales                    | Measures of disease and medicine burden |                                |                     |                    |                     |
|---------------------------------------|-----------------------------------------|--------------------------------|---------------------|--------------------|---------------------|
|                                       | <i>Medical condition (n=338)</i>        | <i>Medicine number (n=358)</i> | <i>MRCI (n=277)</i> | <i>DBI (n=262)</i> | <i>CCI (n= 292)</i> |
| <b>Routine and Regimen Complexity</b> | 0.11*                                   | 0.16**                         | 0.01                | 0.24**             | -0.19**             |
| <b>Psychological Burden</b>           | 0.14**                                  | 0.11**                         | 0.08                | 0.28**             | -0.15**             |
| <b>Functional and Role limitation</b> | 0.09*                                   | 0.17**                         | 0.01                | 0.36**             | -0.23**             |
| <b>Therapeutic Relationship</b>       | 0.12*                                   | 0.20**                         | -0.16**             | 0.12*              | -0.19**             |
| <b>Social Burden</b>                  | 0.07                                    | 0.08                           | -0.09               | 0.19**             | -0.23**             |

\*\* $P < 0.001$ , \* $P < 0.05$ , *CCI*= Charleston’s comorbidity index, *DBI*= Drug Burden Index, *MRCI*= Medication Regimen Complexity Index



### Known group validity

Scores of MRB-QoL sub-scales were compared between subgroups of patients hypothesized to differ (e.g. by DBI score, number of medicines and medical conditions). The Mann-Whitney U test was performed to examine differences between subgroups.

Splitting the number of medicines into two groups using  $\geq 5$  medicine as a cut off point for polypharmacy found that both groups were positively correlated with all sub-scales of MRB-QoL. However, patients with polypharmacy had higher levels of medication burden in all sub-scales except in the “social burden” sub-scale (Table 5). In contrast, when over-the-counter medicines were excluded from analyses, there was no statistically significant difference in the mean rank score of burden between patients on polypharmacy and those without, in all sub-scales except in the “psychological burden” sub-scale. Compared to individuals with no exposure (i.e DBI 0), individuals with exposure to anticholinergic and sedatives (i.e DBI >0) had a significantly higher levels of medication burden in all sub-scales of MRB-QoL (Table 5). However, splitting the data with a DBI cut- off point of 1 (data not shown) did not show a significant difference between patients with DBI 0-1 vs DBI>1 in any sub-scales of MRB-QoL except for “functional and role limitation” ( $p= 0.02$ ) and “psychological” sub-scales ( $p=0.01$ ) where individuals with higher exposure to anticholinergics and sedatives (DBI >1) had also higher levels of medication burden on physical and psychological wellbeing. Patients with multiple morbidities ( $\geq 3$  different medical conditions) had significantly higher levels of burden in all sub-scales of MRB-QoL except for the “Social Burden” sub-scale (Table 5).

Although not part of a priori hypothesis, subgroup analyses by age and gender were conducted. Analysis by age group showed statistically significant differences between younger (<65) and older ( $\geq 65$ ) patients where, younger patients had higher scores (i.e poorer quality of life) in all sub-scales than older ( $\geq 65$ ) adults. Due to higher levels of multi-morbidity and polypharmacy associated with aging, older people may have poorer quality of life when compared with their younger patients. However, this was not observed in this study and the observed statistical differences between the groups may not be clinically significant. In contrast, analysis by gender showed no significant differences between males and females in all sub-scales except in the “Therapeutic relationship” sub-scale in which males had slightly higher scores.

Table 5: Known group validity of MRB-QoL sub-scales

| MRB-QoL sub-scales                    | Subgroups                       | Median (IQR)   | Difference between subgroups: P-value <sup>b</sup> |
|---------------------------------------|---------------------------------|----------------|----------------------------------------------------|
| <b>Routine and regimen complexity</b> | All patients (n= 363)           | 24 (15-33)     |                                                    |
|                                       | ≥ 5 number of medicines (n=197) | 25 (17-35)     | <0.01*                                             |
|                                       | < 5 number of medicines (n=161) | 23 (14-30)     |                                                    |
|                                       | ≥ 3 conditions (n=193)          | 25 (17-33)     | 0.02*                                              |
|                                       | <3 conditions (n=168)           | 22 (14.3-32.8) |                                                    |
|                                       | Age ≥65 years (n=174)           | 20 (13-25)     | <0.01*                                             |
|                                       | Age <65 (n=189)                 | 29 (22-38)     |                                                    |
|                                       | Male (n=185)                    | 24 (16-34)     | 0.43                                               |
|                                       | Female (n=178)                  | 23 (15-33)     |                                                    |
|                                       | DBI 0 (n=131)                   | 19 (11-28)     | <0.01*                                             |
| DBI>0 (n=147)                         | 25 (17-33)                      |                |                                                    |
| <b>Psychological burden</b>           | All patients (n= 363)           | 21 (16-24)     |                                                    |
|                                       | ≥ 5 number of medicines (n=196) | 21 (17-24)     | 0.03*                                              |
|                                       | < 5 number of medicines (n=162) | 20 (14-24)     |                                                    |
|                                       | ≥ 3 conditions (n=192)          | 22 (17-25)     | 0.01*                                              |
|                                       | <3 conditions (n=169)           | 19 (15-24)     |                                                    |
|                                       | Age ≥65 years (n=174)           | 19 (12-22)     | <0.01*                                             |
|                                       | Age <65 (n=189)                 | 22 (18-25)     |                                                    |
|                                       | Male (n=185)                    | 21 (16-24)     | 0.74                                               |
|                                       | Female (n=178)                  | 21 (16-24)     |                                                    |
|                                       | DBI 0 (n=131)                   | 19 (12-23)     | <0.01*                                             |
| DBI>0 (n=147)                         | 22 (18-25)                      |                |                                                    |
| <b>Functional and role limitation</b> | All patients (n= 351)           | 19 (14-24)     |                                                    |
|                                       | ≥ 5 number of medicines (n=190) | 20.5 (15-25)   | <0.01*                                             |
|                                       | < 3 number of medicines (n=156) | 18 (12-23.8)   |                                                    |
|                                       | ≥ 3 conditions (n=186)          | 20 (15-25)     | 0.05*                                              |
|                                       | <3 conditions (n=163)           | 18 (14-24)     |                                                    |
|                                       | Age ≥65 years (n=174)           | 16 (14-21)     | <0.01*                                             |
| Age <65 (n=189)                       | 22 (17-28)                      |                |                                                    |

<sup>b</sup>Differences between subgroups (mean rank score) were examined using a Mann-Whitney *U* test. A *P* value of 0.05 was considered statistically significant\* , IQR= Inter Quartile Range,

Table 5 continued

|                                 | Subgroups                       | Median (IQR) | Difference between subgroups: P-value <sup>b</sup> |
|---------------------------------|---------------------------------|--------------|----------------------------------------------------|
|                                 | Male (n=182)                    | 20 (14-24)   | 0.26                                               |
|                                 | Female (n=169)                  | 18 (14-24)   |                                                    |
|                                 | DBI 0 (n=128)                   | 16 (11-21)   | <0.01*                                             |
|                                 | DBI >0 (n=141)                  | 21 (16-25)   |                                                    |
| <b>Therapeutic relationship</b> | All patients (n= 367)           | 6 (4-9)      |                                                    |
|                                 | ≥ 5 number of medicines (n=200) | 6 (4-10)     | <0.01*                                             |
|                                 | < 5 number of medicines (n=162) | 6 (3-7)      |                                                    |
|                                 | ≥ 3 conditions (n=195)          | 6 (4-9)      | 0.02*                                              |
|                                 | <3 conditions (n=170)           | 6 (3-8)      |                                                    |
|                                 | Age ≥65 years (n=176)           | 5 (3-6)      | <0.01*                                             |
|                                 | Age <65 (n=191)                 | 7 (5-10)     |                                                    |
|                                 | Male (n=183)                    | 6 (4-9)      | 0.04*                                              |
|                                 | Female (n=175)                  | 6 (3-8)      |                                                    |
|                                 | DBI 0 (n=132)                   | 6 (3-7)      | 0.02*                                              |
|                                 | DBI >0 (n=148)                  | 6 (4-8)      |                                                    |
| <b>Social burden</b>            | All patients (n= 358)           | 9 (6-13)     |                                                    |
|                                 | ≥ 5 number of medicines (n=195) | 9 (6-14)     | 0.14                                               |
|                                 | < 5 number of medicines (n=158) | 9 (5-13)     |                                                    |
|                                 | ≥ 3 conditions (n=190)          | 10 (7-14)    | 0.12                                               |
|                                 | <3 conditions (n=166)           | 9 (5.8-13)   |                                                    |
|                                 | Age ≥65 years (n=171)           | 8 (4-10)     | <0.01*                                             |
|                                 | Age <65 (n=187)                 | 12 (8-16)    |                                                    |
|                                 | Male (n=183)                    | 10 (6-13)    | 0.67                                               |
|                                 | Female (n=175)                  | 9 (6-13)     |                                                    |
|                                 | DBI 0 (n=130)                   | 8 (4-12)     | <0.01*                                             |
|                                 | DBI >0 (n=145)                  | 9 (8-13)     |                                                    |

<sup>b</sup>Differences between subgroups (mean rank score) were examined using a Mann-Whitney *U* test. A *P* value of 0.05 was considered statistically significant\* , IQR= Inter Quartile Range,

## Discussion

MRB-QoL is a patient reported measure specifically designed to evaluate the burden of medicines on quality of life. The results based on a survey of 367 consumers indicated that MRB-QoL has good psychometric properties. All sub-scales demonstrated high internal consistency. The construct validity of MRB-QoL was demonstrated through its correlation with MRCI and DBI. Further, known group validity of this measure has been demonstrated via its ability to detect differences between subgroups of individuals such as those on polypharmacy, DBI>0 and with multimorbidity.

The MRB-QoL tool validated in this study had 31 items grouped into five sub-scales. The content of MRB-QoL covered various aspects of medication associated burden. Some items reflected the burden associated with the routines of medicines (eg. items 1, 2, 3, 4, 5, 6, 10), or complexity of medicine regimen (eg. items 7, 8, 9, 11) whereas others focused on the burden of medicine on social (eg. items 29, 30, 31), psychological (eg. items 12, 13, 14, 15, 16, 17) and physical wellbeing or functioning (eg. items 18, 19, 20, 21, 22, 23, 24). These subscales match well to a priori theoretical conceptual framework and supported by several qualitative research into medication and treatment burden<sup>5 6 38-40</sup>. This indicates the thoroughness in the approach used to inform the development of MRB-QoL<sup>1 17 23</sup>. However, three items about financial burden of medicine, which were included in the initial pool of items based on evidence from meta-synthesis data, were dropped from final items following factor analysis (eg. 'I worry about paying medication related expenses'). This may be because the burden of medicine costs might not have been a major concern for the study participants, as the Australian Government has a well-established co-payment scheme known as Pharmaceutical Benefit Scheme. Apart from the lack of items about financial burden, the comprehensiveness of MRB-QoL is apparent from its concept extending beyond the burden of medicine number (i.e polypharmacy), pharmacologic class and nature of medicine regimens.

Correlations between sub-scales of MRB-QoL and DBI<sup>26</sup> and MRCI<sup>27</sup> demonstrated the construct validity of the MRB-QoL. The weak correlation between MRB-QoL sub-scales and the two measures supported the priori hypothesis that MRB-QoL is a separate concept from other measures of medication burden. This difference is clear in that MRB-QoL is multi-scale patient

1  
2  
3 self-reported measure of the burden of medicine on quality of life whereas both DBI and MRCI  
4 are objective measures of medication burden which quantify the pharmacologic ‘complexity of  
5 medicine regimes’<sup>27</sup> and cumulative effects of ‘exposure to medicines with anticholinergic and  
6 sedatives properties’<sup>26</sup> respectively. This implies usefulness of MRB-QoL as a patient reported  
7 measure in complementing these objective measures of medication burden as it provides a  
8 patient’s perspective of medication burden. A fairly moderate degree of correlation between DBI  
9 and “Functional and role limitation” sub-scale of MRB-QoL aligns with existing evidence that  
10 the DBI is a measure of medication burden related functional decline <sup>26</sup>. This is also a  
11 preliminary evidence indicating that “Functional and role limitation” sub-scale of MRB-QoL is  
12 a self-rated measure of functional burden of medication. The correlations between CCI and all  
13 sub-scales of MRB-QoL did not support our a priori hypothesis. However, the inverse  
14 correlation perhaps may indicate that when CCI (i.e chance of mortality related to burden of  
15 multi-morbidity) increases, the more likely patients become overwhelmed by the burden of  
16 multi-morbidity and may become less concerned about medicine attributed burden and  
17 medication related quality of life outcomes.  
18  
19  
20  
21  
22  
23  
24  
25  
26  
27  
28  
29  
30

31  
32 Criterion validity of MRB-QoL has not been evaluated due to the lack of suitable published  
33 standard measure of quality of life to compare with MRB-QoL. While MRB-QoL was under  
34 development process, few papers on measurement of medicine focused quality of life<sup>41 42</sup> ,  
35 treatment burden<sup>43-45</sup> and “patients’ experiences of prescription medicine use”<sup>46</sup> have been  
36 published. However, medicine focused quality of measures were developed in culturally and  
37 linguistically different settings<sup>41 42</sup>. Thus, a direct comparison with MRB-QoL was not possible  
38 before they are culturally translated and validated in the English language. Treatment burden  
39 instruments, measure “the impact of health care on patients’ functioning and wellbeing”<sup>43-45</sup> ,  
40 including some dimension of medicine, they are however, not specific to medicine burden.  
41 Likewise, despite some similarities between MRB-QoL and measure of medicine use  
42 experiences (eg. LMQ)<sup>46</sup> in their notion of measuring medicine burden, there are however, basic  
43 conceptual, domain and item level differences with MRB-QoL. For instance, the LMQ focus on  
44 positive experiences with medicine. This differs from the notion of medication-related burden  
45 used in the MRB-QoL, defined as “a negative experience with medicine, which may impact on  
46 health and wellbeing, beliefs and behaviors towards medicine and care plans”<sup>1</sup>. The physical,  
47  
48  
49  
50  
51  
52  
53  
54  
55  
56  
57  
58  
59  
60

1  
2  
3 social and psychological subscales of the MRB-QoL, are not in the LMQ<sup>46</sup>. There are also  
4 differences in the focus of items within some related scales. For example, items of ‘Therapeutic  
5 relationship’ subscale in the MRB-QoL were focused on the burden arising from lack of good  
6 therapeutic relationships. However, in the LMQ, items of ‘Doctor’ and ‘pharmacist’ subscales  
7 were more focused on positive experiences of relationships, different from perspectives of the  
8 MRB-QoL. Furthermore, in the MRB-QoL, a 2-week recall period was used, however, recall  
9 period has not been specified in the LMQ. Finally, although both measures have a similar 5 point  
10 Likert-type scale, the LMQ used ‘Neutral opinion’ for the middle response category whereas in  
11 the MRB-QoL, ‘Neither Agree nor Disagree’ was used. It known that survey respondents may  
12 endorse ‘neutral opinion’ due to ambivalence or to avoid cognitive effort to answer the  
13 question.<sup>47</sup> In addition, ‘neutral opinion’, may mean that respondents are undecided, have mixed  
14 feelings, do not understand, or refusing to answer the question<sup>48</sup>. Thus, we preferred not to  
15 include ‘neutral opinion’ in our survey response category.  
16  
17  
18  
19  
20  
21  
22  
23  
24  
25  
26  
27

### 28 **Implications for clinical practice and future research**

29  
30 At present, the complete picture of the benefit of Pharmaceutical Care services in improving  
31 quality of life is not well recognized due to the variability of measures used in the studies. There  
32 is also no consensus regarding which HRQoL measure to use for the evaluation of PC services<sup>17</sup>  
33<sup>23</sup> and these issues have contributed to the inconsistency of results making demonstration of the  
34 benefit PC services on quality of life challenging<sup>17</sup>. The MRB-QoL has been designed to be an  
35 evaluative measure to assess the changes quality of life related to medicine burden in patients  
36 receiving clinical medication reviews or PC interventions. In clinical practice, it may also be  
37 used as a diagnostic/screening tool to identify individual patients at higher risk of experiencing  
38 medication-related burden before it adversely affects a patient’s quality of life. For example, in  
39 the present study it was found that individuals with higher exposure to medicines with  
40 anticholinergic and sedative effects (i.e DBI >1) had significantly higher levels of burden in the  
41 “functional and role limitation” (p= 0.02) and “psychological” (p=0.01) sub-scales of MRB-  
42 QoL indicating higher risk for poorer medication-related functional and psychological well-  
43 being. This finding agrees with previous studies, which reported strong association between high  
44 DBI scores and functional impairment particularly in older adults<sup>26 49-52</sup>. Evidence for known  
45 group validity also demonstrated that patients with DBI>0, polypharmacy (except in the “social  
46  
47  
48  
49  
50  
51  
52  
53  
54  
55  
56  
57  
58  
59  
60

burden” sub-scale) and multimorbidity had significantly higher levels of burden in all sub-scales of MRB-QoL implying a greater risk for poorer medication-related quality of life outcomes. While there is strong evidence regarding the association between DBI>0<sup>26 49</sup>, multimorbidity and quality of life adverse outcomes, there is limited evidence linking the impact of polypharmacy (pill burden) and quality of life outcomes<sup>53</sup>. This requires further investigation. The contribution of over-the-counter medicines to polypharmacy related medication burden was evident during subgroup analysis for known group validity. This requires the attention of health care providers because sometimes patients can have significant burden arising from non-prescription medicines<sup>54</sup>, which is often underappreciated<sup>55</sup>. Hence, patient reported measures such as MRB-QoL are of high importance in bringing those issues to health care providers’ attentions to make informed decision.

Another finding of interest was that there were no significant differences between males and females in their MRB-QoL except in the “Therapeutic relationship” sub-scale where males had a slightly higher score. The absence of significant differences between males and females in SB, RRC, PsyB, FRL subscales may imply that generally gender does not influence the way patients perceive the burden of medicine on functioning and wellbeing. On the other hand, the observed difference in the therapeutic relationship sub-scale may imply that females have a greater tendency to negotiate their care plans with their health care providers than males and thus, may have less concern about poor therapeutic relationships. It should be highlighted that despite differences observed in the mean rank scores (i.e Mann-Whitney U test), the median score appeared to be similar. however, Mann-Whitney test is sensitive to detect the differences in distributions between the groups despite the similarity in the median scores<sup>56</sup>. Therefore, detection and identification of patients at higher risk of any aspects of medication-related burden (eg. Routines, regimen complexity, concern about number or interaction, or psychosocial and physical impacts of medicines) is an opportunity for clinicians to engage patients in therapeutic decisions and to individualize interventions to particular aspects of medication-related burden encountered by their patients.

### Strengths and limitations

1  
2  
3  
4  
5  
6  
7  
8  
9  
10  
11  
12  
13  
14  
15  
16  
17  
18  
19  
20  
21  
22  
23  
24  
25  
26  
27  
28  
29  
30  
31  
32  
33  
34  
35  
36  
37  
38  
39  
40  
41  
42  
43  
44  
45  
46  
47  
48  
49  
50  
51  
52  
53  
54  
55  
56  
57  
58  
59  
60

This study described the development and validation process of the MRB-QoL based on robust methods and highlighted its potential application for research and clinical practice. The development aspects of MRB-QoL such as construct definition and development of the MRB framework, generation of an item pool, and psychometric testing were informed by data from patients. The item development was based on 966 quotes of participant's identified through meta-synthesis of 34 qualitative studies. It was anticipated that this approach is more robust than a traditional method of item generation which is restricted to interviews with a single cohort of participants. The development of Patient Reported Outcome Measures (PROMs) using methods other than interviews and focus group discussions have been commonly used in literature<sup>57</sup>. However, qualitative concept-elicitation with consumers may have revealed additional concepts of medicine related burden which were not incorporated in our MRB-QoL tool. Furthermore, cognitive debriefing may have also improved the clarity or content of the MRB-QoL items. Some consumers might have not had their medicines with them when completing the survey or may not have been willing to share information about their medicine and thus, this study may have under reported information about medicines. This might have also resulted in under reporting of the DBI and MRCI because only cases with complete information about medicines were considered for calculation. Furthermore, since data were only from patient self-report; it was not possible to comment on the clinical appropriateness or inappropriateness of polypharmacy. We used a factor based scores approach, which gives equal weighing to each item in obtaining scores of sub-scales. This approach is simple and scores obtained by this method can be reliably compared across future studies. However, in the absence of empirical evidence it is not a sound approach to assume that each item has equal weight in making up a particular sub-scale. Although strong evidence of ceiling and floor effect has not been observed, a slightly high (>15%)<sup>58</sup> ceiling effect in the "therapeutic relationship" and floor effect in the "social burden" sub-scales were found. Future investigations could therefore include sensitivity and responsiveness of the MRB-QoL. The initial psychometric testing reported in this paper has set the ground work for future research to look into additional psychometric testing such as confirmatory factor analysis, test-retest reliability, sensitivity and responsiveness of the MRB-QoL. Determining cutoff points for MRB-QoL scores which can be considered as clinically important difference, and testing the applicability of MRB-QoL in different populations should also be evaluated.



1  
2  
3  
4  
5 **Conclusions:** The MRB-QoLV.1 has good construct validity and internal consistency reliability.  
6  
7 The MRB-QoL tool may be a useful humanistic measure for evaluation of the impact of  
8  
9 pharmaceutical care interventions on patients' quality of life. Future research is warranted to  
10  
11 further examine other psychometric properties of MRB-QoL V.1 and its utility in patient care.  
12  
13

14  
15  
16 **Acknowledgments** The authors thank the Survey Sampling International (SSI) research  
17  
18 company for conducting online survey of MRB-QoL and all the study participants.  
19

20  
21 **Contributions** MAM contributed to the conception and design, analysis and interpretation,  
22  
23 drafted and reviewed the manuscript. RJM contributed to the design and interpretation, and  
24  
25 reviewed the manuscript. SNH contributed to the interpretation and reviewed the manuscript.  
26  
27 LKO contributed to the interpretation and reviewed the manuscript. TFC contributed to the  
28  
29 conception and design, interpretation and reviewed the manuscript.

30  
31 **Funding** This research received no specific grant from any funding agency in the public,  
32  
33 commercial or not-for-profit sectors.

34  
35 **Competing interest** we declare that we have no competing interests.  
36

37  
38 **Patient consent** obtained. The participants were informed that completing the survey implied the  
39  
40 consent to the study.

41  
42 **Ethics approval** Human Ethics Committee, The University of Sydney (project number:  
43  
44 2016/654).

45  
46 **Provenance and peer review** Not commissioned; externally peer reviewed  
47

48  
49 **Data sharing statement** No additional data are available.  
50

51  
52 **Supplementary file: Conceptual model of MRB-QoL (doc)**  
53  
54  
55  
56  
57  
58  
59  
60

## References

1. Mohammed MA, Moles RJ, Chen TF. Medication-related burden and patients' lived experience with medicine: a systematic review and metasynthesis of qualitative studies. *BMJ Open* 2016;6(2) doi: 10.1136/bmjopen-2015-010035
2. Wallace E, Salisbury C, Guthrie B, et al. Managing patients with multimorbidity in primary care. *Bmj* 2015;350:h176. doi: 10.1136/bmj.h176 [published Online First: 2015/02/04]
3. Matthe M, Murawski JPB. Pharmaceutical Therapy-Related Quality of Life: Conceptual Development. *Journal of Social and Administrative Pharmacy*. 2001;18(1).
4. Krska J, Morecroft CW, Poole H, et al. Issues potentially affecting quality of life arising from long-term medicines use: a qualitative study. *International journal of clinical pharmacy* 2013;35(6):1161-9. doi: 10.1007/s11096-013-9841-5 [published Online First: 2013/08/31]
5. Tran V-T, Barnes C, Montori VM, et al. Taxonomy of the burden of treatment: a multi-country web-based qualitative study of patients with chronic conditions. *BMC Medicine* 2015;13(1):115. doi: 10.1186/s12916-015-0356-x
6. Sav A, Kendall E, McMillan SS, et al. 'You say treatment, I say hard work': treatment burden among people with chronic illness and their carers in Australia. *Health and Social Care in the Community* 2013;21(6):665-74.
7. Hepler CD, Strand LM. Opportunities and responsibilities in pharmaceutical care. *American journal of hospital pharmacy* 1990;47(3):533-43. [published Online First: 1990/03/01]
8. Kheir NM, van Mil JW, Shaw JP, et al. Health-related quality of life measurement in pharmaceutical care. Targeting an outcome that matters. *Pharm World Sci* 2004;26(3):125-8. [published Online First: 2004/07/03]

- 1  
2  
3  
4  
5  
6  
7  
8  
9  
10  
11  
12  
13  
14  
15  
16  
17  
18  
19  
20  
21  
22  
23  
24  
25  
26  
27  
28  
29  
30  
31  
32  
33  
34  
35  
36  
37  
38  
39  
40  
41  
42  
43  
44  
45  
46  
47  
48  
49  
50  
51  
52  
53  
54  
55  
56  
57  
58  
59  
60
9. Alldred DP, Raynor DK, Hughes C, et al. Interventions to optimise prescribing for older people in care homes. *The Cochrane database of systematic reviews* 2013;2:Cd009095. doi: 10.1002/14651858.CD009095.pub2 [published Online First: 2013/03/02]
10. de Lyra DP, Kheir N, Abriata JP, et al. Impact of Pharmaceutical Care interventions in the identification and resolution of drug-related problems and on quality of life in a group of elderly outpatients in Ribeirao Preto (SP), Brazil. *Ther Clin Risk Manag* 2007;3(6):989-98. [published Online First: 2008/06/03]
11. Gourley GA, Portner TS, Gourley DR, et al. Humanistic outcomes in the hypertension and COPD arms of a multicenter outcomes study. *Journal of the American Pharmaceutical Association (Washington,DC : 1996)* 1998;38(5):586-97. [published Online First: 1998/10/23]
12. Bladh L, Ottosson E, Karlsson J, et al. Effects of a clinical pharmacist service on health-related quality of life and prescribing of drugs: a randomised controlled trial. *BMJ quality & safety* 2011;20(9):738-46. doi: 10.1136/bmjqs.2009.039693 [published Online First: 2011/01/07]
13. Kheir N, Emmerton L, Shaw J. Can pharmacists influence the health-related quality of life of patients with asthma?: The New Zealand Pharmaceutical Care experience. *J Sci Res Med Sci* 2001;3(2):69-75. [published Online First: 2001/10/01]
14. Schulz M, Verheyen F, Muhlig S, et al. Pharmaceutical care services for asthma patients: a controlled intervention study. *J Clin Pharmacol* 2001;41(6):668-76. [published Online First: 2001/06/14]
15. Isetts BJ, Schondelmeyer SW, Heaton AH, et al. Effects of collaborative drug therapy management on patients' perceptions of care and health-related quality of life. *Res Social Adm Pharm* 2006;2(1):129-42. doi: 10.1016/j.sapharm.2005.12.002 [published Online First: 2006/12/02]
16. Pinto SL, Kumar J, Partha G, et al. Pharmacist-provided medication therapy management (MTM) program impacts outcomes for employees with diabetes. *Population health management* 2014;17(1):21-7. doi: 10.1089/pop.2012.0124 [published Online First: 2013/07/16]
17. Mohammed MA, Moles RJ, Chen TF. Impact of Pharmaceutical Care Interventions on Health-Related Quality-of-Life Outcomes: A Systematic Review and Meta-analysis. *Ann*

- 1  
2  
3  
4  
5  
6  
7  
8  
9  
10  
11  
12  
13  
14  
15  
16  
17  
18  
19  
20  
21  
22  
23  
24  
25  
26  
27  
28  
29  
30  
31  
32  
33  
34  
35  
36  
37  
38  
39  
40  
41  
42  
43  
44  
45  
46  
47  
48  
49  
50  
51  
52  
53  
54  
55  
56  
57  
58  
59  
60
- Pharmacother* 2016;50(10):862-81. doi: 10.1177/1060028016656016 [published Online First: 2016/07/02]
18. Viswanathan M, Kahwati LC, Golin CE, et al. Medication therapy management interventions in outpatient settings: a systematic review and meta-analysis. *JAMA Intern Med* 2015;175(1):76-87. doi: 10.1001/jamainternmed.2014.5841 [published Online First: 2014/11/18]
19. Malone DC, Carter BL, Billups SJ, et al. Can clinical pharmacists affect SF-36 scores in veterans at high risk for medication-related problems? *Med Care* 2001;39(2):113-22. [published Online First: 2001/02/15]
20. Holland R, Desborough J, Goodyer L, et al. Does pharmacist-led medication review help to reduce hospital admissions and deaths in older people? A systematic review and meta-analysis. *Br J Clin Pharmacol* 2008;65(3):303-16. doi: 10.1111/j.1365-2125.2007.03071.x [published Online First: 2007/12/21]
21. Jarab AS, Alqudah SG, Khmour M, et al. Impact of pharmaceutical care on health outcomes in patients with COPD. *Int J Clin Pharm* 2012;34(1):53-62. doi: 10.1007/s11096-011-9585-z [published Online First: 2011/11/22]
22. Volume CI, Farris KB, Kassam R, et al. Pharmaceutical care research and education project: patient outcomes. *J Am Pharm Assoc (Wash)* 2001;41(3):411-20. [published Online First: 2001/05/25]
23. Mohammed MA, Rebekah J Moles, Timothy F Chen. Content analysis of Health-Related Quality of Life (HRQoL) measures used in Pharmaceutical Care studies: a period of 1990 to 2015. *International Journal of Clinical Pharmacy* 2017 (under preparation)
24. Pickard AS, Hung SY. An update on evidence of clinical pharmacy services' impact on health-related quality of life. *Ann Pharmacother* 2006;40(9):1623-34. doi: 10.1345/aph.1G653 [published Online First: 2006/08/17]
25. Pickard AS, Johnson JA, Farris KB. The impact of pharmacist interventions on health-related quality of life. *Ann Pharmacother* 1999;33(11):1167-72. [published Online First: 1999/11/26]
26. Hilmer SN, Mager DE, Simonsick EM, et al. A drug burden index to define the functional burden of medications in older people. *Arch Intern Med* 2007;167(8):781-7. doi: 10.1001/archinte.167.8.781 [published Online First: 2007/04/25]

- 1  
2  
3 27. George J, Phun YT, Bailey MJ, et al. Development and validation of the medication regimen  
4 complexity index. *Ann Pharmacother* 2004;38(9):1369-76. doi: 10.1345/aph.1D479  
5 [published Online First: 2004/07/22]  
6  
7
- 8 28. Tabachnick BG, Fidell LS, eds. Using multivariate statistics. 5th ed. Boston: Allyn and Bacon;  
9 2007.  
10
- 11 29. Bryant FB, Yarnold PR. Principal components analysis and exploratory and confirmatory  
12 factor analysis. In: Grimm LG, Yarnold PR, eds. Reading and Understanding  
13 Multivariate Statistics. Washington, DC: American Psychological Association; 1995. p.  
14 99–136.  
15  
16
- 17 30. Pedhazur E, Schmelkin L. Measurement, Design, and Analysis. Hillsdale, NJ: Lawrence  
18 Erlbaum Associates; 1991  
19
- 20 31. Pett MA, Lackey NR, Sullivan JJ. Making Sense of Factor Analysis. Thousand Oaks, CA:  
21 Sage Publications; 2003.  
22
- 23 32. Cronbach L: Coefficient alpha and the internal structure of tests. *Psychometrika* 1951,  
24 16:297-334.  
25  
26
- 27 33. Cohen, J. (1988). Statistical power analysis for the behavioral sciences (2nd ed.). Hillsdale,  
28 NJ: Lawrence Erlbaum Associates.  
29
- 30 34. Gnjidic D, Hilmer SN, Blyth FM, et al. Polypharmacy cutoff and outcomes: five or more  
31 medicines were used to identify community-dwelling older men at risk of different  
32 adverse outcomes. *J Clin Epidemiol* 2012;65(9):989-95. doi:  
33 10.1016/j.jclinepi.2012.02.018 [published Online First: 2012/06/30]  
34  
35
- 36 35. Best O, Gnjidic D, Hilmer SN, et al. Investigating polypharmacy and drug burden index in  
37 hospitalised older people. *Intern Med J* 2013;43(8):912-8. doi: 10.1111/imj.12203  
38 [published Online First: 2013/06/06]  
39  
40
- 41 36. Gnjidic D, Cumming RG, Le Couteur DG, et al. Drug Burden Index and physical function in  
42 older Australian men. *Br J Clin Pharmacol* 2009;68(1):97-105. doi: 10.1111/j.1365-  
43 2125.2009.03411.x [published Online First: 2009/08/08]  
44  
45
- 46 37. Nunnally JO: Psychometric theory. New York, McGraw-Hill; 1978.  
47  
48
- 49 38. Demain S, Goncalves AC, Areia C, et al. Living with, managing and minimising treatment  
50 burden in long term conditions: a systematic review of qualitative research. *PLoS one*  
51  
52  
53  
54  
55  
56  
57  
58  
59  
60

- 1  
2  
3 2015;10(5):e0125457. doi: 10.1371/journal.pone.0125457 [published Online First:  
4 2015/05/30]  
5  
6  
7 39. Rosbach M, Andersen JS. Patient-experienced burden of treatment in patients with  
8 multimorbidity - A systematic review of qualitative data. *PloS one* 2017;12(6):e0179916.  
9 doi: 10.1371/journal.pone.0179916 [published Online First: 2017/06/24]  
10  
11 40. Sav A, King MA, Whitty JA, et al. Burden of treatment for chronic illness: a concept analysis  
12 and review of the literature. *Health expectations : an international journal of public*  
13 *participation in health care and health policy* 2015;18 doi: 10.1111/hex.12046  
14  
15 41. Sakthong P, Suksanga P, Sakulbumrungsil R, et al. Development of Patient-reported  
16 Outcomes Measure of Pharmaceutical Therapy for Quality of Life (PROMPT-QoL): A  
17 novel instrument for medication management. *Res Social Adm Pharm* 2015;11(3):315-  
18 38. doi: 10.1016/j.sapharm.2014.10.002 [published Online First: 2014/12/03]  
19  
20 42. Tseng HM, Lee CH, Chen YJ, et al. Developing a measure of medication-related quality of  
21 life for people with polypharmacy. *Qual Life Res* 2016;25(5):1295-302. doi:  
22 10.1007/s11136-015-1177-2 [published Online First: 2015/11/21]  
23  
24 43. Tran VT, Harrington M, Montori VM, et al. Adaptation and validation of the Treatment  
25 Burden Questionnaire (TBQ) in English using an internet platform. *BMC Med*  
26 2014;12:109. doi: 10.1186/1741-7015-12-109 [published Online First: 2014/07/06]  
27  
28 44. Eton DT, Yost KJ, Lai JS, et al. Development and validation of the Patient Experience with  
29 Treatment and Self-management (PETS): a patient-reported measure of treatment burden.  
30 *Qual Life Res* 2016 doi: 10.1007/s11136-016-1397-0 [published Online First:  
31 2016/08/28]  
32  
33 45. Tran VT, Montori VM, Eton DT, et al. Development and description of measurement  
34 properties of an instrument to assess Treatment Burden among patients with multiple  
35 chronic conditions. *BMC Med* 2012;10 doi: 10.1186/1741-7015-10-68  
36  
37 46. Krska J, Katusiime B, Corlett SA. Validation of an instrument to measure patients'  
38 experiences of medicine use: the Living with Medicines Questionnaire. *Patient*  
39 *preference and adherence* 2017;11:671-79. doi: 10.2147/ppa.s126647 [published Online  
40 First: 2017/04/14]  
41  
42  
43  
44  
45  
46  
47  
48  
49  
50  
51  
52  
53  
54  
55  
56  
57  
58  
59  
60

- 1  
2  
3  
4  
5  
6  
7  
8  
9  
10  
11  
12  
13  
14  
15  
16  
17  
18  
19  
20  
21  
22  
23  
24  
25  
26  
27  
28  
29  
30  
31  
32  
33  
34  
35  
36  
37  
38  
39  
40  
41  
42  
43  
44  
45  
46  
47  
48  
49  
50  
51  
52  
53  
54  
55  
56  
57  
58  
59  
60
47. Krosnick JA, Holbrook AL, Berent MK, et al. The Impact of "No Opinion" Response Options on Data Quality: Non-Attitude Reduction or an Invitation to Satisfice?\*. *Public Opinion Quarterly* 2002;66(3):371-403. doi: 10.1086/341394
  48. DeVellis, Robert F. *Scale Development: Theory and Applications* (2nd ed). 2003. Thousand Oaks: Sage.
  49. Gnjjidic D, Bell JS, Hilmer SN, et al. Drug Burden Index associated with function in community-dwelling older people in Finland: a cross-sectional study. *Ann Med* 2012;44(5):458-67. doi: 10.3109/07853890.2011.573499 [published Online First: 2011/04/19]
  50. Hilmer SN, Mager DE, Simonsick EM, et al. Drug burden index score and functional decline in older people. *Am J Med* 2009;122(12):1142-49.e1-2. doi: 10.1016/j.amjmed.2009.02.021 [published Online First: 2009/12/05]
  51. Lowry E, Woodman RJ, Soiza RL, et al. Drug burden index, physical function, and adverse outcomes in older hospitalized patients. *J Clin Pharmacol* 2012;52(10):1584-91. doi: 10.1177/0091270011421489 [published Online First: 2011/12/15]
  52. Kouladjian L, Gnjjidic D, Chen TF, et al. Drug Burden Index in older adults: theoretical and practical issues. *Clin Interv Aging* 2014;9:1503-15. doi: 10.2147/cia.s66660 [published Online First: 2014/09/24]
  53. Lalic S, Jamsen KM, Wimmer BC, et al. Polypharmacy and medication regimen complexity as factors associated with staff informant rated quality of life in residents of aged care facilities: a cross-sectional study. *Eur J Clin Pharmacol* 2016;72(9):1117-24. doi: 10.1007/s00228-016-2075-4 [published Online First: 2016/06/03]
  54. Lees J (2013) Management of polypharmacy in older cancer patients. *Cancer Forum* 37:230–233.
  55. Turner JP, Jamsen KM, Shakib S, et al. Polypharmacy cut-points in older people with cancer: how many medications are too many? *Support Care Cancer* 2016;24(4):1831-40. doi: 10.1007/s00520-015-2970-8 [published Online First: 2015/10/10]
  56. Hart A. Mann-Whitney test is not just a test of medians: differences in spread can be important. *BMJ : British Medical Journal* 2001;323(7309):391-93.
  57. Wiering B, de Boer D, Delnoij D. Patient involvement in the development of patient-reported outcome measures: a scoping review. *Health expectations : an international journal of*

1  
2  
3 *public participation in health care and health policy* 2017;20(1):11-23. doi:  
4 10.1111/hex.12442 [published Online First: 2016/02/19]  
5  
6

- 7 58. Terwee CB, Bot SD, de Boer MR, et al. Quality criteria were proposed for measurement  
8 properties of health status questionnaires. *J Clin Epidemiol* 2007;60(1):34-42. doi:  
9 10.1016/j.jclinepi.2006.03.012 [published Online First: 2006/12/13]  
10  
11  
12  
13  
14  
15  
16  
17  
18  
19  
20  
21  
22  
23  
24  
25  
26  
27  
28  
29  
30  
31  
32  
33  
34  
35  
36  
37  
38  
39  
40  
41  
42  
43  
44  
45  
46  
47  
48  
49  
50  
51  
52  
53  
54  
55  
56  
57  
58  
59  
60

For peer review only



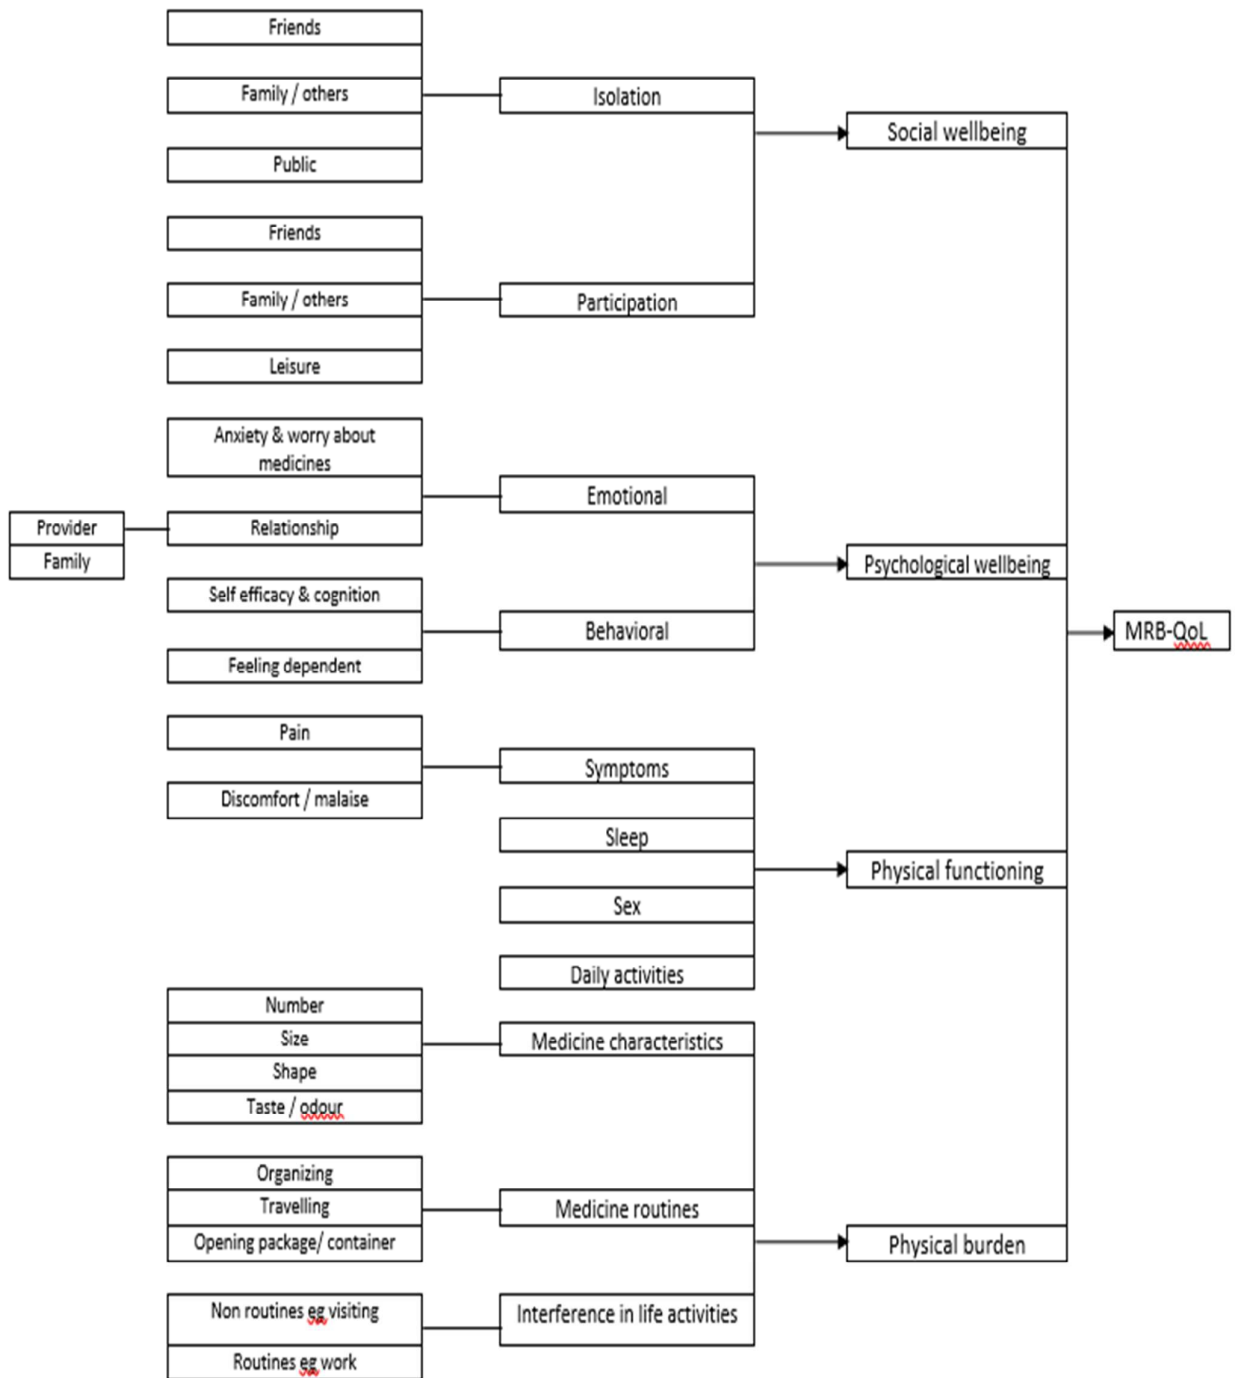

Supplementary file: Conceptual model of Medication-Related Burden for Quality of Life (MRB-QoL)

# BMJ Open

## Development and validation of an instrument for measuring the burden of medicine on functioning and well-being: the Medication-Related Burden Quality of Life (MRB-QoL) tool

|                                 |                                                                                                                                                                                                                                                          |
|---------------------------------|----------------------------------------------------------------------------------------------------------------------------------------------------------------------------------------------------------------------------------------------------------|
| Journal:                        | <i>BMJ Open</i>                                                                                                                                                                                                                                          |
| Manuscript ID                   | bmjopen-2017-018880.R1                                                                                                                                                                                                                                   |
| Article Type:                   | Research                                                                                                                                                                                                                                                 |
| Date Submitted by the Author:   | 30-Sep-2017                                                                                                                                                                                                                                              |
| Complete List of Authors:       | Mohammed, Mohammed; The University of Sydney, Moles, Rebekah; The University of Sydney, Faculty of Pharmacy Hilmer, Sarah; University of Sydney, Royal North Shore Hospital Kouladjian O'Donnell, Lisa Chen, Timothy; Pharmacy, The University of Sydney |
| <b>Primary Subject Heading</b>: | Health services research                                                                                                                                                                                                                                 |
| Secondary Subject Heading:      | Health services research, General practice / Family practice, Patient-centred medicine, Pharmacology and therapeutics                                                                                                                                    |
| Keywords:                       | THERAPEUTICS, GENERAL MEDICINE (see Internal Medicine), Health & safety < HEALTH SERVICES ADMINISTRATION & MANAGEMENT                                                                                                                                    |
|                                 |                                                                                                                                                                                                                                                          |

SCHOLARONE™  
Manuscripts

1  
2  
3 **Development and validation of an instrument for measuring the burden of medicine on**  
4 **functioning and well-being: the Medication-Related Burden Quality of Life (MRB-QoL)**  
5 **tool**  
6  
7  
8

9 Mohammed A Mohammed <sup>\*1</sup>, Rebekah J Moles<sup>1</sup>, Sarah N Hilmer<sup>2,3</sup>, Lisa Kouladjian O'Donnel  
10 <sup>2,3</sup>, Timothy F Chen<sup>1</sup>  
11  
12

13  
14  
15  
16 Mohammed A Mohammed  
17

18  
19 B.Pharm, M.Pharm (Clinical), PhD Candidate  
20

21  
22 <sup>1</sup>Faculty of Pharmacy, University of Sydney, New South Wales, Australia  
23

24 Email: [mmoh2116@uni.sydney.edu.au](mailto:mmoh2116@uni.sydney.edu.au)  
25  
26  
27

28  
29 Rebekah J Moles  
30

31  
32 DipHPharm, B.Pharm, PhD  
33

34 Associate Professor  
35

36  
37 <sup>1</sup>Faculty of Pharmacy, University of Sydney, New South Wales, Australia  
38

39 Email: [Rebekah.moles@sydney.edu.au](mailto:Rebekah.moles@sydney.edu.au)  
40  
41  
42  
43  
44

45 Sarah N Hilmer  
46

47 MD, PhD  
48

49  
50 Staff Specialist and Professor of Geriatric Pharmacology  
51

52  
53 <sup>2</sup>Department of Clinical Pharmacology and Aged Care, Royal North Shore Hospital, Kolling  
54 Institute of Medical Research, Sydney, Australia.  
55  
56  
57  
58  
59  
60

1  
2  
3 <sup>3</sup>Cognitive Decline Partnership Centre, Sydney Medical School, University of Sydney, Sydney,  
4  
5 Australia  
6  
7  
8  
9

10 Lisa Kouladjian O'Donnel

11  
12 B.MedSc(Hons), M.Pharm, PhD

13  
14  
15 Postdoctoral Fellow  
16  
17

18 <sup>2</sup>Department of Clinical Pharmacology and Aged Care, Royal North Shore Hospital, Kolling  
19  
20 Institute of Medical Research, Sydney, Australia.  
21

22 <sup>3</sup>Cognitive Decline Partnership Centre, Sydney Medical School, University of Sydney, Sydney,  
23  
24 Australia  
25

26  
27 Email: [lisa.kouladjian@sydney.edu.au](mailto:lisa.kouladjian@sydney.edu.au)  
28  
29

30  
31  
32 Timothy F Chen

33  
34  
35 PhD, DipHPharm, B.Pharm

36  
37  
38 Associate Professor  
39

40 <sup>1</sup>Faculty of Pharmacy, University of Sydney, New South Wales, Australia  
41

42  
43 Email: [timothy.chen@sydney.edu.au](mailto:timothy.chen@sydney.edu.au)  
44  
45

46  
47 **Correspondence\*:**

48  
49 Mohammed A Mohammed

50  
51 The University of Sydney, Faculty of Pharmacy, A15 Science Rd, Sydney, Australia

52  
53 Tell: +6193517114  
54

55  
56 Email: [mmoh2116@uni.sydney.edu.au](mailto:mmoh2116@uni.sydney.edu.au)  
57  
58  
59  
60

## Abstract

**Objective:** Medication-Related Burden (MRB) is a negative experience with medicine, which may impact on psychological, social, physical, and financial well-being of an individual. This study describes the development and initial validation of an instrument specifically designed to measure medication-related burden on functioning and well-being- the Medication-Related Burden Quality of Life (MRB-QoL) tool.

**Methods:** An initial pool of 76-items for MRB-QoL was generated. The link to MRB-QoL survey was sent to a sample of consumers living with at least one chronic medical condition and taking  $\geq 3$  prescription medicines on a regular basis. Exploratory Factor Analysis (EFA) was used to determine the underlining factor structure. Internal consistency (Chronbach's alpha) and construct validity were examined. The latter were examined through correlation with Medication Regimen Complexity Index (MRCI), Drug Burden Index (DBI) and Charlson's comorbidity index (CCI).

**Results:** 367 consumers completed the survey (51.2% male). EFA resulted in a 31-item, five-factor solution explaining 72% of the total variance. The five-sub-scales were labeled as "Routine and Regimen Complexity" (11 items), "Psychological Burden" (6 items), "Functional and Role Limitation" (7 items), "Therapeutic Relationship" (3 items) and "Social Burden" (4 items). All sub-scales showed good internal consistency (Cronbach's  $\alpha$  0.87 to 0.95). Discriminant validity of MRB-QoL was demonstrated via its correlations with MRCI (Spearman's  $r$  -0.16 to 0.08), DBI ( $r$  0.12 to 0.28) and CCI ( $r$  -0.23 to -0.15). Correlation between DBI and "Functional and Role Limitation" sub-scale ( $r$  0.36) indicated some evidence of convergent validity. Patients with polypharmacy, multiple morbidity, and DBI  $>0$  had higher median scores of MRB-QoL providing evidence for known group validity.

**Conclusions:** The MRB-QoL V.1 has good construct validity and internal consistency. The MRB-QoL may be a useful humanistic measure for evaluating the impact of pharmaceutical care interventions on patients' quality of life. Future research is warranted to further examine additional psychometric properties of MRB-QoL V.1 and its utility in patient care.

### Strengths and Limitations of this study

- This study described the development and validation of the MRB-QoL tool based on robust methods and highlighted its potential application for research and practice.
- MRB-QoL V.1 has good construct validity and internal consistency.
- The MRB-QoL can be used to facilitate evaluation of humanistic outcome in pharmaceutical care interventions.
- This tool fills a need in pharmacotherapy research and has also a potential for use as a screening tool in clinical practice to identify patients at high risk of experiencing medication related burden.
- Validation of a patient-reported measure cannot be completed in a single study thus; MRB-QoL requires further validation such as confirmatory factor analysis, test-retest reliability, sensitivity and responsiveness.

## Introduction

Medicines represent the most common form of therapy in the management of chronic medical conditions<sup>1</sup>. Clinical management of various chronic medical conditions often requires prescribing of multiple medicines especially in people with multi-morbidity<sup>2</sup>. Although medicines usually improve patient health outcomes, for some patients long term use of multiple medicines may become burdensome<sup>1</sup> and have negative consequences<sup>3</sup>. Patients often experience medication related burden because of the routines associated with taking medicines, adverse events, nature of medicines (eg. inconvenience or complexity of the regimen), challenges associated with the health care system (eg. access to medicines) and interference with social activities<sup>1</sup>. The encountered medication-related burden can adversely affect the social, psychological and physical wellbeing of an individual<sup>1 3-5</sup>. Patients experiencing medication related burden often report poor health related quality of life (HRQoL)<sup>1 5 6</sup>.

Improving a patient's HRQoL outcome is an ultimate goal of 'Pharmaceutical Care' (PC) services<sup>7</sup> defined as "responsible provision of drug therapy for the purpose of achieving definite outcomes that improve a patient's quality of life." It is medication therapy focused health care provided to achieve improved medication therapy and quality of life for patients. The social, psychological and physical impact of medication therapy on patients' lives is a critical humanistic dimension that should be evaluated in all PC interventions<sup>8</sup>. However, it is not known how the core elements of PC interventions (i.e. identification and resolution of drug related problems) is linked to changes in humanistic outcomes<sup>9</sup>. Thus, demonstrating the full picture of the benefit of PC services in improving patients' HRQoL outcomes remains challenging. Existing evidence is inconclusive and conflicting<sup>10-21</sup>. The lack of sensitivity and specificity of existing HRQoL measures to capture the humanistic outcome aspects related to the impact of drug therapy may be a contributing factor<sup>8 17 22 23</sup>.

Over the last three decades, outcomes of HRQoL in PC research have been evaluated using generic and or disease specific HRQoL measures<sup>17 23-25</sup>. These measures, however, have been developed to evaluate the impact of disease burden on patients' life not specifically the impact of pharmacotherapy<sup>17 23</sup>. Our recent systematic review and content analysis showed that out of the total 1019 items identified from 37 HRQoL measures used in PC studies published between 1990 and 2015, only 34 items were specifically about medicines<sup>23</sup>. This review further highlighted that items about medicines did not appear to have been focused on the burden of medicines on

1  
2  
3 functioning and well-being. This implies that existing HRQoL measures lack specificity to PC  
4 services and sensitivity to detect changes in HRQoL caused by the burden of medicines.  
5

6  
7 Other widely used measures of medication burden such as Drug Burden Index (DBI) <sup>26</sup> and  
8 Medication Regimen Complexity Index (MRCI) <sup>27</sup> are useful objective measures of the burden  
9 of medicines. However, neither is a patient-reported and a humanistic measure. There is  
10 currently no validated measure of Medication-Related Burden on quality of life. This study  
11 reports on the development and preliminary validation of an instrument specifically designed to  
12 measure the burden of medicine on functioning and well-being from the patient's perspective.  
13  
14  
15  
16  
17  
18  
19  
20  
21  
22  
23  
24  
25  
26  
27  
28  
29  
30  
31  
32  
33  
34  
35  
36  
37  
38  
39  
40  
41  
42  
43  
44  
45  
46  
47  
48  
49  
50  
51  
52  
53  
54  
55  
56  
57  
58  
59  
60



## Methods

### Development of the MRB-QoL tool

The MRB-QoL tool was developed in three phases (Figure 1). Phase I involved: conceptualization of the area through meta-synthesis of Medication-Related Burden and patients' lived experience with medicines<sup>1</sup>, meta-analysis of Pharmaceutical Care (PC) impact on HRQoL<sup>17</sup>, content analysis of HRQoL measures used in PC studies<sup>23</sup>. Phase II involved: the generation and refinement of an item pool. Phase III involved: the psychometric testing of the items using responses from a sample of Australian health and medicines consumers.

### Item pool

Meta-synthesis of 34 qualitative studies about patients' lived experience with medicine provided a core foundation for item generation<sup>1</sup>. Over 966 quotes of patients were identified through meta-synthesis and used as a source to generate an item bank. We believed that generation of a pool of items via this approach was advantageous in establishing a strong conceptual foundation and theoretical understanding, when compared to traditional methods of item generation based on an interview with a single cohort of participants. It was anticipated that this approach may be more comprehensive in generating a pool of items covering a wide range of medicine-associated burden across multiple chronic illnesses. We used Nvivo 10 (QRS International, Victoria) Software to facilitate coding and analysis of participants' quotes<sup>1</sup>. Following analyses of coded data, a pool of 76 items representing relevant medicine associated burden were generated. A theoretical conceptual framework of MRB-QoL (see supplementary file 1) was used to guide the item development process. The framework was developed based on the themes of MRB identified in our meta-synthesis<sup>1</sup>, recommended domains of HRQoL in evaluation of pharmaceutical care (PC) services<sup>8 17</sup> and conceptual gaps in the HRQoL measures used in PC interventions<sup>3 23</sup>. Quality of life instruments specifically designed to evaluate PC services should encompass at least physical, social and psychological domains<sup>8 17</sup>. Several existing HRQoL measures used in the evaluation of PC interventions encompass these three domains, however, the domains lack items about the burden of medicine on health and well-being<sup>1 17 23</sup>. In light of this, items of MRB-QoL were designed in a way to typically focus on medication burden ranging from the inconvenience of dealing with routines to the burden on social, psychological, physical and financial well-being.

## Study sample and data collection

A consumer panel fulfilling the inclusion criteria was recruited via an Australian market research company, the Survey Sampling International (SSI). Consumers had to be 18 years or older, taking  $\geq 3$  prescription medicine on a regular basis and living with at least one medical condition. The estimated sample size ( $n=380$ ) was calculated using 5:1 ratio i.e. five participants per item<sup>28 29</sup>. The market research company distributed a survey monkey link to the MRB-QoL to potential participants. Screening questions were used to allow only eligible participants (based on age, number of medicines and medical conditions) to complete the survey. Eligible participants were asked to indicate on a 5 point Likert scale the extent to which they agreed or disagreed with each statement of MRB-QoL tool where, '1 = strongly agree', '2= agree', '3= neither agree nor disagree', '4= disagree', and '5= strongly disagree'. In addition, 'prefer not to answer' was included as an alternative option to respect participants' choice of not responding to a given item. A two-week recall period was used to help participants recall relevant experience associated with specific aspects of medicine burden e.g. *"considering the impact of your medicine on your physical wellbeing during the past two weeks, indicate how much you agree or disagree with the following statement?"*. The survey also had an open-ended section for participants to document names of medical conditions and, names of medicines, their strengths and directions for use. Participants were asked to complete sections about medicines (prescribed by doctors and obtained over the counter) only when they were at home and had complete access to their medicines.

## Data Analyses

Characteristics of study participants were summarized using descriptive statistics. Tests for normality (Shapiro wilk test, Q-Q plot, Box plot, Histogram, skewness and kurtosis) showed that the analyzed variables were not normally distributed. Hence, continuous variables were summarized using medians and range whereas categorical variables were reported using frequencies and percentages. Exploratory Factor Analysis (EFA) using oblique rotation was conducted to determine the factor structure underlying MRB-QoL. An oblique method of factor rotation was chosen because of expected correlation among the factors<sup>30 31</sup>. Before factor analysis, suitability of the data for factor analysis was checked using Kaiser-Mayer Olkin (KMO) measure of sampling adequacy (value  $>0.8$ ), Bartlett's Test of Sphericity ( $p <0.01$ ) and

1  
2  
3 inspection of the correlation matrix for coefficients  $\geq 0.3$ <sup>28</sup>. An initial factor solution was  
4 determined by visual inspection of scree plots and Eigen values  $>1$ . Final items were retained  
5 based on factor loadings ( $>0.3$ ), no cross loadings on two or more factors ( $> 0.3$ ), item-total  
6 correlations and interpretability with regard to extracted factors. Cronbach's alpha coefficient  
7 was used to assess internal consistency reliability<sup>32</sup>. Testing convergent (moderate to high  
8 correlations i.e.  $r >0.3$ )<sup>33</sup> and discriminant (weak correlations i.e.  $r \leq 0.3$ ) validity of MRB-QoL  
9 in relation to DBI (measure of exposure to medicines with anticholinergic and sedative effects),  
10 MRCI (measure of complexity of medicine regimen) and Charlson's Comorbidity Index/CCI  
11 (measure of disease burden) was planned where data were available (i.e. detailed information  
12 about name of medicine, strengths and directions for use and detailed information on diagnoses).  
13 We hypothesized that domains of MRB-QoL would be positively correlated with DBI, MRCI  
14 and CCI, but the MRB-QoL is a separate concept from all the three indices. Similarly, with an a  
15 priori assumption that patients on polypharmacy ( $\geq 5$  different medicines)<sup>34</sup>, with multimorbidity  
16 ( $\geq 3$  different medical conditions)<sup>35-39</sup> and  $DBI > 0$  may have poorer MRB-QoL, we planned to test  
17 known group validity of the MRB-QoL if sufficient data were available for these variables.  
18 MRCI was calculated as the sum of scores of dosage forms used, dosage frequency and  
19 additional instructions<sup>27</sup>. DBI for each participant was calculated as the sum of exposure to each  
20 medicine with anticholinergic or sedative effects<sup>26</sup> taking into account the total daily dose and  
21 the recommended minimum daily dose by the Therapeutic Goods Administration of Australia<sup>40</sup>  
22<sup>41</sup>. Australian approved lists of medicines were used to define medicines with clinically  
23 significant anticholinergic and sedating effects. A conversion formula to transform scores of  
24 MRB-QoL scales into a single overall index or total score has been proposed (See supplementary  
25 file 2). Data were analyzed using SPSS Statistics version 22 for windows.  
26  
27  
28  
29  
30  
31  
32  
33  
34  
35  
36  
37  
38  
39  
40  
41  
42  
43  
44  
45

## 46 Results

47 Three-hundred and sixty-seven participants completed the survey and 51.2 % of respondents  
48 were male. The median number of prescription medicines and medical condition were 5 and 3  
49 respectively. Most of the respondents were on five or more medicines ( $n=200$ ) and living with 3  
50 or more medical conditions ( $n=195$ ). Exposure to  $DBI > 0$  was 52.9% ( $n=148$ ) with a median of  
51 0.9. Older people ( $\geq 65$  years) accounted for 60.6% and 47.3% of patients with  $DBI = 0$  ( $n=132$ )  
52  
53  
54  
55  
56  
57  
58  
59  
60

and DBI>0 (n=148) respectively. Detailed characteristics of survey respondents are presented in Table 1.

Table 1: Characteristics of survey respondents (n=367)

| Variable                                                                                                                        |               |
|---------------------------------------------------------------------------------------------------------------------------------|---------------|
| Age in years (IQR)                                                                                                              | 64 (49-70)    |
| Male gender, n (%)                                                                                                              | 188 (51.2)    |
| Number of medical conditions (IQR)                                                                                              | 3 (2-3)       |
| Number of prescription medicines (IQR)                                                                                          | 5 (3-7)       |
| Number of over the counter medicines (IQR)                                                                                      | 2 (1-3)       |
| CCI (IQR)                                                                                                                       | 3 (0-4)       |
| MRCI (IQR)                                                                                                                      | 9 (7-13)      |
| Total DBI (IQR)                                                                                                                 | 0.5 (0-0.9)   |
| DBI>0 (IQR)                                                                                                                     | 0.9 (0.7-1.6) |
| Age <65 years, median (IQR)                                                                                                     | 1.2 (1.01)    |
| Age ≥65 years median (IQR)                                                                                                      | 0.7 (0.8)     |
| DBI categories                                                                                                                  |               |
| DBI 0, n (%)                                                                                                                    | 132 (47.1)    |
| DBI 0-1, n (%)                                                                                                                  | 81 (28.9)     |
| DBI >1, n (%)                                                                                                                   | 67 (23.9)     |
| DBI= Drug Burden Index, CCI= Charlson's Comorbidity Index, IQR= Inter Quartile Range, MRCI= Medication Regimen Complexity Index |               |

### Factor analysis and scales of MRB-QoL measure

No item had > 5% missing data. After removing items with low loadings and cross loadings, Exploratory Factor Analysis (EFA) resulted in 31-item, five-factor solution which explained 72.1 % of the total variance. Based on the items that constituted each factor, the factors were interpreted as Factor 1: "Routine and Regimen Complexity" (items 1-11), Factor 2: "Psychological Burden" (items 12-17), Factor 3: "Functional and Role Limitation" (items 18-24), Factor 4: "Therapeutic Relationship" (items 25-27), Factor 5: "Social Burden" (items 28-31) (Table 2). The correlation between factors ranged from 0.33 to 0.57. In this paper, sub-scales are

used referring to factors. All items of each sub-scale were reverse coded such that the higher scores reflected higher level of the scale's characteristic (i.e. higher burden of medicine and poorer quality of life).

Table 2: Factor structure and loadings of the MRB-QoL items

| S.No | Items                                      | Factors     |             |             |             |              |
|------|--------------------------------------------|-------------|-------------|-------------|-------------|--------------|
|      |                                            | F1          | F2          | F3          | F4          | F5           |
| 15   | Organizing medicine routines (RRC-1)       | <b>.934</b> | -.056       | -.018       | -.083       | -.026        |
| 16   | Keeping medicine record (RRC-2)            | <b>.913</b> | -.007       | -.053       | -.069       | -.046        |
| 17   | Routine-managing (RRC-3)                   | <b>.841</b> | .066        | -.038       | -.021       | -.052        |
| 18   | Fitting medicine routines (RRC-4)          | <b>.838</b> | -.011       | .051        | -.077       | -.070        |
| 19   | Interference with daily activities (RRC-5) | <b>.705</b> | .065        | .082        | .132        | .020         |
| 20   | Balancing-interference (RRC-6)             | <b>.684</b> | .049        | .038        | .190        | -.010        |
| 21   | Simplicity of medicine regimen (RRC-7)     | <b>.671</b> | .021        | .053        | .095        | -.110        |
| 22   | Medicine-instructions (RRC-8)              | <b>.656</b> | .057        | .052        | .125        | -.020        |
| 23   | Regimen-convenience (RRC-9)                | <b>.651</b> | .030        | -.005       | .023        | -.207        |
| 24   | Medicine and daily life schedules (RRC-10) | <b>.651</b> | -.015       | .107        | .171        | -.024        |
| 25   | Medicine-package (RRC-11)                  | <b>.535</b> | .050        | .087        | .131        | .141         |
| 26   | Long term-medicine (PsyB-1)                | -.023       | <b>.854</b> | .011        | -.082       | -.154        |
| 27   | Number of medicines (PsyB-2)               | .080        | <b>.832</b> | -.066       | .132        | .086         |
| 28   | Long term- impact (PsyB-3)                 | -.092       | <b>.795</b> | .054        | .043        | -.067        |
| 29   | Medicine reminds health condition (PsyB-4) | .018        | <b>.766</b> | .017        | .002        | -.109        |
| 30   | Medicine-interactions (PsyB-5)             | .145        | <b>.744</b> | .024        | .153        | .174         |
| 31   | Medicine-signifies problem (PsyB-6)        | .021        | <b>.614</b> | .184        | -.119       | -.176        |
| 32   | Sexual relationship (FRL-1)                | -.075       | -.125       | <b>.913</b> | .093        | -.053        |
| 33   | Sexual activity (FRL-2)                    | -.065       | -.069       | <b>.908</b> | .027        | -.014        |
| 34   | Medicine and physical health (FRL-3)       | .052        | .205        | <b>.670</b> | -.029       | -.104        |
| 35   | Medicine and night-sleep (FRL-4)           | .101        | .104        | <b>.658</b> | .070        | .003         |
| 36   | Medicine and physical activities (FRL-5)   | .094        | .244        | <b>.613</b> | -.002       | .052         |
| 37   | Medicine- impact on work (FRL-6)           | .265        | .036        | <b>.609</b> | .019        | -.064        |
| 38   | Comfort and side effect (FRL-7)            | .259        | .226        | <b>.533</b> | -.104       | .025         |
| 39   | Respect and dignity (TR-1)                 | .005        | -.019       | .067        | <b>.826</b> | -.085        |
| 40   | Decisions and considerations (TR-2)        | .012        | .104        | .021        | <b>.804</b> | -.088        |
| 41   | Decisions and engagement (TR-3)            | .108        | .036        | .037        | <b>.757</b> | -.049        |
| 42   | Lived experience with others (SB-1)        | .035        | .148        | .084        | .079        | <b>-.720</b> |
| 43   | Public-perception (SB-2)                   | .147        | .087        | -.009       | .097        | <b>-.719</b> |
| 44   | People and stigma (SB-3)                   | .193        | .044        | .139        | .113        | <b>-.620</b> |

1  
2  
3  
4  
5  
6  
7  
8  
9  
10  
11  
12  
13  
14  
15  
16  
17  
18  
19  
20  
21  
22  
23  
24  
25  
26  
27  
28  
29  
30  
31  
32  
33  
34  
35  
36  
37  
38  
39  
40  
41  
42  
43  
44  
45  
46  
47  
48  
49  
50  
51  
52  
53  
54  
55  
56  
57  
58  
59  
60

|    |                           |       |      |      |      |              |
|----|---------------------------|-------|------|------|------|--------------|
| 31 | Self-stigma (SB-4)        | .190  | .027 | .069 | .213 | <b>-.576</b> |
|    | <b>Eigen value</b>        | 16.44 | 2.16 | 1.58 | 1.11 | 1.05         |
|    | <b>Variance explained</b> | 53.05 | 6.97 | 5.10 | 3.61 | 3.39         |

F1= Routine and Regimen Complexity (RRC), F2= Psychological Burden(PsyB), F3= Functional and Role Limitation(FRL), F4= Therapeutic Relationship(TR), F5=Social Burden(SB)

### Reliability and characteristics of MRB-QoL

Internal consistency of the MRB-QoL sub-scales ranged from 0.87 to 0.95 indicating that all sub-scales had good internal consistency reliability<sup>42</sup>. There was no strong evidence of ceiling and floor effects except for the “Therapeutic Relationship” sub-scale which had a slightly higher ceiling and the “Social Burden” sub-scale which showed a slightly higher floor effect (Table 3).

Table 3: Descriptive statistics and reliabilities for sub-scales of MRB-QoL measure

| MRB-QoL sub-scales (items) | N   | Factor-based score (IQR) | Score range | Cronbach's $\alpha$ | % Floor | % Ceiling |
|----------------------------|-----|--------------------------|-------------|---------------------|---------|-----------|
| <b>RRC (11 items)</b>      | 363 | 24 (15-33)               | 11-55       | 0.95                | 0.6     | 13.2      |
| <b>PsyB (6 items)</b>      | 363 | 21 (16-24)               | 6-30        | 0.91                | 2.8     | 3.3       |
| <b>FR (7 items)</b>        | 351 | 19 (14-24)               | 7-35        | 0.92                | 1.1     | 6.0       |
| <b>TR (3 items)</b>        | 367 | 6 (4-9)                  | 3-15        | 0.87                | 1.4     | 24.8      |
| <b>SB (4 items)</b>        | 358 | 9 (6-13)                 | 4-20        | 0.91                | 19.0    | 1.7       |

**RRC** = Routine and Regimen Complexity, **PsyB**= Psychological Burden, **FR**= Functional and Role Limitation, **TR**= Therapeutic Relationship, **SB**=Social Burden, N= number of respondents, **IQR**= Interquartile Range

### Construct validity

Moderate to high inter-item correlations (range 0.41-0.85) and correlations of items with their own sub-scales (corrected item-total correlation 0.56-0.93) provided good evidence of internal construct validity of all MRB-QoL sub-scales.

Both number of medicines and medical conditions were significantly correlated with all sub-scales of MRB-QoL except in the “Social Burden” sub-scale (Table 4). Item 13, which pertained to the number of medicines, was found to have moderate to high correlations (0.48-0.81) with all sub-scales of MRB-QoL (data not shown). There were weak correlations between Medication

Regimen Complexity Index (MRCI) and all sub-scales of MRB-QoL indicating that MRCI and sub-scales of MRB-QoL are separate constructs of measures of medication burden (Table 4). “Therapeutic Relationship” and “Social Burden” sub-scales of MRB-QoL were inversely correlated with MRCI ( $r = -0.16$  vs  $0.09$ ).

Drug Burden Index score was significantly and positively correlated with all sub-scales of MRB-QoL (Table 4). Moderate correlation between DBI and the “Functional and Role Limitation” sub-scale of MRB-QoL provided some evidence of convergent validity, indicating that both DBI and this sub-scale measure the burden of medicine on functional outcomes. However, the weak magnitude of correlations across the remaining sub-scales of MRB-QoL (spearman rho 0.12 to 0.28) demonstrated discriminant validity, indicating that these sub-scales measure dimensions of medication burden different from that of DBI. The inclusion of ‘PRN’ or ‘as needed’ medicines did not show significant differences both in the magnitude and direction of correlations (spearman rho 0.18 to 0.34). Furthermore, we intended to quantify patient level medication burden by incorporating all the medicines in objective measures (i.e. DBI, MRCI) and compare them with patient self-rated MRB-QoL scores. Hence, in this study PRN medicines (excluding vitamins and herbal medicines) were included in the DBI calculation. Statistically significant but weak and inverse correlations were found between CCI and all sub-scales of MRB-QoL indicating discriminant validity (Table 4).

Table 4: Construct validity of MRB-QoL sub-scales

| MRB-QoL sub-scales                    | Measures of disease and medicine burden      |                                            |                                 |                                |                                 |
|---------------------------------------|----------------------------------------------|--------------------------------------------|---------------------------------|--------------------------------|---------------------------------|
|                                       | <i>Medical condition</i><br>( <i>n=338</i> ) | <i>Medicine number</i><br>( <i>n=358</i> ) | <i>MRCI</i><br>( <i>n=277</i> ) | <i>DBI</i><br>( <i>n=262</i> ) | <i>CCI</i><br>( <i>n= 292</i> ) |
| <b>Routine and Regimen Complexity</b> | 0.11*                                        | 0.16**                                     | 0.01                            | 0.24**                         | -0.19**                         |
| <b>Psychological Burden</b>           | 0.14**                                       | 0.11**                                     | 0.08                            | 0.28**                         | -0.15**                         |
| <b>Functional and Role Limitation</b> | 0.09*                                        | 0.17**                                     | 0.01                            | 0.36**                         | -0.23**                         |
| <b>Therapeutic Relationship</b>       | 0.12*                                        | 0.20**                                     | -0.16**                         | 0.12*                          | -0.19**                         |
| <b>Social Burden</b>                  | 0.07                                         | 0.08                                       | -0.09                           | 0.19**                         | -0.23**                         |

\*\**A P Value* < 0.001, \* *A P Value* < 0.05, *CCI*= Charleston’s comorbidity index, *DBI*= Drug Burden Index, *MRCI*= Medication Regimen Complexity Index

### Known groups validity

Scores of MRB-QoL sub-scales were compared between subgroups of patients hypothesized to differ (e.g. by DBI score, number of medicines and medical conditions). The Mann-Whitney U test was performed to examine differences between subgroups.

Splitting the number of medicines into two groups using  $\geq 5$  medicine as a cut off point for polypharmacy found that both groups were positively correlated with all sub-scales of MRB-QoL. However, patients with polypharmacy had higher levels of medication burden in all sub-scales except in the “Social Burden” sub-scale (Table 5). In contrast, when over-the-counter medicines were excluded from analyses, there was no statistically significant difference in the mean rank score of burden between patients on polypharmacy and those without, in all sub-scales except in the “Psychological Burden” sub-scale. Compared to individuals with no exposure (i.e DBI 0), individuals with exposure to anticholinergic and sedatives (i.e DBI  $>0$ ) had a significantly higher levels of medication burden in all sub-scales of MRB-QoL (Table 5). However, splitting the data with a DBI cut- off point of 1 (data not shown) did not show a significant difference between patients with DBI 0-1 vs DBI  $>1$  in any sub-scales of MRB-QoL except for “Functional and Role Limitation” ( $p=0.02$ ) and “Psychological Burden” sub-scales ( $p=0.01$ ) where individuals with higher exposure to anticholinergics and sedatives (DBI  $>1$ ) had also higher levels of medication burden on physical and psychological wellbeing. Patients with multiple morbidities ( $\geq 3$  different medical conditions) had significantly higher levels of burden in all sub-scales of MRB-QoL except for the “Social Burden” sub-scale (Table 5).

Although not part of a priori hypothesis, subgroup analyses by age and gender were conducted. Analysis by age group showed statistically significant differences between younger ( $<65$  years) and older ( $\geq 65$  years) patients where, younger patients had higher scores (i.e. poorer quality of life) in all sub-scales than older ( $\geq 65$  years) adults. In contrast, analysis by gender showed no significant differences between males and females in all sub-scales except in the “Therapeutic Relationship” sub-scale in which males had slightly higher scores.



Table 5: Known groups validity of MRB-QoL sub-scales

| MRB-QoL sub-scales                    | Subgroups                       | Median (IQR) | Difference between subgroups: P-value <sup>b</sup> |
|---------------------------------------|---------------------------------|--------------|----------------------------------------------------|
| <b>Routine and Regimen Complexity</b> | All patients (n= 363)           | 24 (15-33)   |                                                    |
|                                       | ≥ 5 number of medicines (n=197) | 25 (17-35)   | <0.01*                                             |
|                                       | < 5 number of medicines (n=161) | 23 (14-30)   |                                                    |
|                                       | ≥ 3 conditions (n=193)          | 25 (17-33)   | 0.02*                                              |
|                                       | <3 conditions (n=168)           | 22 (14-32)   |                                                    |
|                                       | Age ≥65 years (n=174)           | 20 (13-25)   | <0.01*                                             |
|                                       | Age <65 (n=189)                 | 29 (22-38)   |                                                    |
|                                       | Male (n=185)                    | 24 (16-34)   | 0.43                                               |
|                                       | Female (n=178)                  | 23 (15-33)   |                                                    |
|                                       | DBI 0 (n=131)                   | 19 (11-28)   | <0.01*                                             |
| DBI>0 (n=147)                         | 25 (17-33)                      |              |                                                    |
| <b>Psychological Burden</b>           | All patients (n= 363)           | 21 (16-24)   |                                                    |
|                                       | ≥ 5 number of medicines (n=196) | 21 (17-24)   | 0.03*                                              |
|                                       | < 5 number of medicines (n=162) | 20 (14-24)   |                                                    |
|                                       | ≥ 3 conditions (n=192)          | 22 (17-25)   | 0.01*                                              |
|                                       | <3 conditions (n=169)           | 19 (15-24)   |                                                    |
|                                       | Age ≥65 years (n=174)           | 19 (12-22)   | <0.01*                                             |
|                                       | Age <65 (n=189)                 | 22 (18-25)   |                                                    |
|                                       | Male (n=185)                    | 21 (16-24)   | 0.74                                               |
|                                       | Female (n=178)                  | 21 (16-24)   |                                                    |
|                                       | DBI 0 (n=131)                   | 19 (12-23)   | <0.01*                                             |
| DBI>0 (n=147)                         | 22 (18-25)                      |              |                                                    |
| <b>Functional and Role Limitation</b> | All patients (n= 351)           | 19 (14-24)   |                                                    |
|                                       | ≥ 5 number of medicines (n=190) | 20.5 (15-25) | <0.01*                                             |
|                                       | < 3 number of medicines (n=156) | 18 (12-23.8) |                                                    |
|                                       | ≥ 3 conditions (n=186)          | 20 (15-25)   | 0.05*                                              |
|                                       | <3 conditions (n=163)           | 18 (14-24)   |                                                    |

|                             |            |        |
|-----------------------------|------------|--------|
| Age $\geq$ 65 years (n=174) | 16 (14-21) | <0.01* |
| Age <65 (n=189)             | 22 (17-28) |        |

<sup>b</sup>Differences between subgroups (mean rank score) were examined using a Mann-Whitney *U* test. A *P* value of 0.05 was considered statistically significant\* , IQR= Inter Quartile Range,

Table 5 continued

|                                 | Subgroups                            | Median (IQR) | Difference between subgroups: P-value <sup>b</sup> |
|---------------------------------|--------------------------------------|--------------|----------------------------------------------------|
|                                 | Male (n=182)                         | 20 (14-24)   | 0.26                                               |
|                                 | Female (n=169)                       | 18 (14-24)   |                                                    |
|                                 | DBI 0 (n=128)                        | 16 (11-21)   | <0.01*                                             |
|                                 | DBI >0 (n=141)                       | 21 (16-25)   |                                                    |
| <b>Therapeutic Relationship</b> | All patients (n= 367)                | 6 (4-9)      |                                                    |
|                                 | $\geq$ 5 number of medicines (n=200) | 6 (4-10)     | <0.01*                                             |
|                                 | < 5 number of medicines (n=162)      | 6 (3-7)      |                                                    |
|                                 | $\geq$ 3 conditions (n=195)          | 6 (4-9)      | 0.02*                                              |
|                                 | <3 conditions (n=170)                | 6 (3-8)      |                                                    |
|                                 | Age $\geq$ 65 years (n=176)          | 5 (3-6)      | <0.01*                                             |
|                                 | Age <65 (n=191)                      | 7 (5-10)     |                                                    |
|                                 | Male (n=183)                         | 6 (4-9)      | 0.04*                                              |
|                                 | Female (n=175)                       | 6 (3-8)      |                                                    |
|                                 | DBI 0 (n=132)                        | 6 (3-7)      | 0.02*                                              |
|                                 | DBI>0 (n=148)                        | 6 (4-8)      |                                                    |
| <b>Social Burden</b>            | All patients (n= 358)                | 9 (6-13)     |                                                    |
|                                 | $\geq$ 5 number of medicines (n=195) | 9 (6-14)     | 0.14                                               |
|                                 | < 5 number of medicines (n=158)      | 9 (5-13)     |                                                    |
|                                 | $\geq$ 3 conditions (n=190)          | 10 (7-14)    | 0.12                                               |
|                                 | <3 conditions (n=166)                | 9 (5.8-13)   |                                                    |
|                                 | Age $\geq$ 65 years (n=171)          | 8 (4-10)     | <0.01*                                             |
|                                 | Age <65 (n=187)                      | 12 (8-16)    |                                                    |
|                                 | Male (n=183)                         | 10 (6-13)    | 0.67                                               |
|                                 | Female (n=175)                       | 9 (6-13)     |                                                    |
|                                 | DBI 0 (n=130)                        | 8 (4-12)     | <0.01*                                             |
|                                 | DBI>0 (n=145)                        | 9 (8-13)     |                                                    |

<sup>b</sup>Differences between subgroups (mean rank score) were examined using a Mann-Whitney *U* test. A *P* value of 0.05 was considered

---

statistically significant\* , IQR= Inter Quartile Range,

---

## Discussion

MRB-QoL is a patient reported measure specifically designed to evaluate the burden of medicines on quality of life. The results based on a survey of 367 consumers indicated that MRB-QoL has good psychometric properties. All sub-scales demonstrated high internal consistency. The construct validity of MRB-QoL was demonstrated through its correlation with MRCI and DBI. Further, known group validity of this measure has been demonstrated via its ability to detect differences between subgroups of individuals such as those on polypharmacy, DBI>0 and with multimorbidity.

The MRB-QoL tool validated in this study had 31 items grouped into five sub-scales. The content of MRB-QoL covered various aspects of medication associated burden. Some items reflected the burden associated with the routines of medicines (e.g. items 1, 2, 3, 4, 5, 6, 10), or complexity of medicine regimen (e.g. items 7, 8, 9, 11) whereas others focused on the burden of medicine on social (e.g. items 29, 30, 31), psychological (e.g. items 12, 13, 14, 15, 16, 17) and physical wellbeing or functioning (e.g. items 18, 19, 20, 21, 22, 23, 24). These sub-scales match well to a priori theoretical conceptual framework and supported by several qualitative research into medication and treatment burden<sup>5 6 43-45</sup>. This indicates the thoroughness in the approach used to inform the development of MRB-QoL<sup>1 17 23</sup>. However, three items about financial burden of medicine, which were included in the initial pool of items based on evidence from meta-synthesis data, were dropped from final items following factor analysis (e.g. 'I worry about paying medication related expenses'). This may be because the burden of medicine costs might not have been a major concern for the study participants, as the Australian Government has a well-established co-payment scheme known as Pharmaceutical Benefit Scheme. Apart from the lack of items about financial burden, the comprehensiveness of MRB-QoL is apparent from its concept extending beyond the burden of medicine number (i.e. polypharmacy), pharmacologic class and nature of medicine regimens.

1  
2  
3 Correlations between sub-scales of MRB-QoL and DBI<sup>26</sup> and MRCI<sup>27</sup> demonstrated the  
4 construct validity of the MRB-QoL. The weak correlation between MRB-QoL sub-scales and the  
5 two measures supported the priori hypothesis that MRB-QoL is a separate concept from other  
6 measures of medication burden. This difference is clear in that MRB-QoL is multi-scale patient  
7 self-reported measure of the burden of medicine on quality of life whereas both DBI and MRCI  
8 are objective measures of medication burden which quantify the pharmacologic ‘complexity of  
9 medicine regimes’<sup>27</sup> and cumulative effects of ‘exposure to medicines with anticholinergic and  
10 sedatives properties’<sup>26</sup> respectively. This implies usefulness of MRB-QoL as a patient reported  
11 measure in complementing these objective measures of medication burden as it provides a  
12 patient’s perspective of medication burden. A fairly moderate degree of correlation between DBI  
13 and “Functional and Role Limitation” sub-scale of MRB-QoL aligns with existing evidence that  
14 the DBI is a measure of medication burden related functional decline <sup>26</sup>. This is also a  
15 preliminary evidence indicating that “Functional and Role Limitation” sub-scale of MRB-QoL is  
16 a self-rated measure of functional burden of medication. The correlations between CCI and all  
17 sub-scales of MRB-QoL did not support our a priori hypothesis. However, the inverse  
18 correlation perhaps may indicate that when CCI (i.e. chance of mortality related to burden of  
19 multi-morbidity) increases, the more likely patients become overwhelmed by the burden of  
20 multi-morbidity and may become less concerned about medicine attributed burden and  
21 medication related quality of life outcomes.

22  
23  
24  
25  
26  
27  
28  
29  
30  
31  
32  
33  
34  
35  
36  
37  
38  
39 Criterion validity of MRB-QoL has not been evaluated due to the lack of suitable published  
40 standard measure of quality of life to compare with MRB-QoL. While MRB-QoL was under  
41 development process, few papers on measurement of medicine focused quality of life<sup>46 47</sup> ,  
42 treatment burden<sup>48-50</sup> and “patients’ experiences of prescription medicine use”<sup>51</sup> have been  
43 published. However, medicine focused quality of measures were developed in culturally and  
44 linguistically different settings<sup>46 47</sup>. Thus, a direct comparison with MRB-QoL was not possible  
45 before they are culturally translated and validated in the English language. Treatment burden  
46 instruments, measure “the impact of health care on patients’ functioning and wellbeing”<sup>48-50</sup> ,  
47 including some dimension of medicine, they are however, not specific to the burden of medicine  
48 on functioning and wellbeing. Likewise, despite some similarities between MRB-QoL and  
49  
50  
51  
52  
53  
54  
55  
56  
57  
58  
59  
60

1  
2  
3 measure of medicine use experiences (i.e. LMQ)<sup>51</sup> in their notion of measuring medicine burden,  
4 there are however, basic conceptual, domain and item level differences with MRB-QoL.  
5  
6  
7

### 8 **Implications for clinical practice and future research**

9  
10 At present, the complete picture of the benefit of Pharmaceutical Care services in improving  
11 quality of life is not well recognized due to the variability of measures used in the studies. There  
12 is also no consensus regarding which HRQoL measure to use for the evaluation of PC services<sup>17</sup>  
13  
14  
15  
16  
17  
18  
19  
20  
21  
22  
23  
24  
25  
26  
27  
28  
29  
30  
31  
32  
33  
34  
35  
36  
37  
38  
39  
40  
41  
42  
43  
44  
45  
46  
47  
48  
49  
50  
51  
52  
53  
54  
55  
56  
57  
58  
59  
60

At present, the complete picture of the benefit of Pharmaceutical Care services in improving quality of life is not well recognized due to the variability of measures used in the studies. There is also no consensus regarding which HRQoL measure to use for the evaluation of PC services<sup>17</sup> and these issues have contributed to the inconsistency of results making demonstration of the benefit PC services on quality of life challenging<sup>17</sup>. The MRB-QoL has been designed to be an evaluative measure to assess the changes quality of life related to medicine burden in patients receiving clinical medication reviews or PC interventions. In clinical practice, it may also be used as a diagnostic/screening tool to identify individual patients at higher risk of experiencing medication-related burden before it adversely affects a patient's quality of life. For example, in the present study it was found that individuals with higher exposure to medicines with anticholinergic and sedative effects (i.e. DBI >1) had significantly higher levels of burden in the "Functional and Role Limitation" (p= 0.02) and "Psychological Burden" (p=0.01) sub-scales of MRB-QoL indicating higher risk for poorer medication-related functional and psychological well-being. This finding agrees with previous studies, which reported strong association between high DBI scores and functional impairment particularly in older adults<sup>26 52-55</sup>. Evidence for known group validity also demonstrated that patients with DBI>0, polypharmacy (except in the "Social Burden" sub-scale) and multimorbidity had significantly higher levels of burden in all sub-scales of MRB-QoL implying a greater risk for poorer medication-related quality of life outcomes. While there is strong evidence regarding the association between DBI>0<sup>26 52</sup>, multimorbidity and quality of life adverse outcomes, there is limited evidence linking the impact of polypharmacy (pill burden) and quality of life outcomes<sup>56</sup>. This requires further investigation. The contribution of over-the-counter medicines to polypharmacy related medication burden was evident during subgroup analysis for known group validity. This requires the attention of health care providers because sometimes patients can have significant burden arising from non-prescription medicines<sup>57</sup>, which is often underappreciated<sup>58</sup>. Hence, patient reported measures such as MRB-QoL are of high importance in bringing those issues to health care providers' attentions to make informed decision.

1  
2  
3  
4  
5 Another finding of interest was that there were no significant differences between males and  
6 females in their MRB-QoL except in the “Therapeutic Relationship” sub-scale where males had  
7 a slightly higher score. The absence of significant differences between males and females in SB,  
8 RRC, PsyB, FRL sub-scales may imply that generally gender does not influence the way patients  
9 perceive the burden of medicine on functioning and wellbeing. On the other hand, the observed  
10 difference in the “Therapeutic Relationship” sub-scale may imply that females have a greater  
11 tendency to negotiate their care plans with their health care providers than males and thus, may  
12 have less concern about poor therapeutic relationships. It should be highlighted that despite  
13 differences observed in the mean rank scores (i.e. Mann-Whitney U test), the median score  
14 appeared to be similar. However, the Mann-Whitney test is sensitive to detect the differences in  
15 distributions between the groups despite the similarity in the median scores <sup>59</sup>. Therefore,  
16 detection and identification of patients at higher risk of any aspects of medication-related burden  
17 (eg. routines, regimen complexity, concern about number or interaction, or psychosocial and  
18 physical impacts of medicines) is an opportunity for clinicians to engage patients in therapeutic  
19 decisions and to individualize interventions to particular aspects of medication-related burden  
20 encountered by their patients.  
21  
22  
23  
24  
25  
26  
27  
28  
29  
30  
31  
32  
33  
34

### 35 **Strengths and limitations**

36  
37 This study described the development and validation process of the MRB-QoL based on robust  
38 methods and highlighted its potential application for research and clinical practice. The  
39 development aspects of MRB-QoL such as construct definition and development of the MRB  
40 framework, generation of an item pool, and psychometric testing were informed by data from  
41 patients. The item development was based on 966 quotes of participant’s identified through  
42 meta-synthesis of 34 qualitative studies. It was anticipated that this approach is more robust than  
43 a traditional method of item generation which is restricted to interviews with a single cohort of  
44 participants. The development of Patient Reported Outcome Measures (PROMs) using methods  
45 other than interviews and focus group discussions have been used in literature<sup>60</sup>. However,  
46 qualitative concept-elicitation with consumers may have revealed additional concepts of  
47 medicine related burden which were not incorporated in our MRB-QoL tool. Furthermore,  
48 cognitive debriefing may have also improved the clarity or content of the MRB-QoL items.  
49  
50  
51  
52  
53  
54  
55  
56  
57  
58  
59  
60

1  
2  
3 Some consumers might have not had their medicines with them when completing the survey or  
4 may not have been willing to share information about their medicine and thus, this study may  
5 have under reported information about medicines. This might have also resulted in under  
6 reporting of the DBI and MRCI because only cases with complete information about medicines  
7 were considered for calculation. Furthermore, since data were only from patient self-report; it  
8 was not possible to comment on the clinical appropriateness or inappropriateness of  
9 polypharmacy. A possible limitation of an on-line survey is only participants who were computer  
10 literate and who had access to the internet could participate. It is noteworthy, however, that our  
11 study sample did include older people taking multiple medicines. One hundred seventy-six  
12 participants were aged  $\geq 65$  years and the median number of prescription medicines taken was 5  
13 (3-7). Furthermore, the potential sampling bias, of having only computer literate participants  
14 with access to the internet, is unlikely to affect the results of psychometric testing (i.e. the factor  
15 structure). However, the extent of burden observed in the scores of MRB-QoL sub-scales and  
16 relatively low complexity of medication regimen observed in the MRCI, may reflect that  
17 participants were well functioning community dwelling adults. Intensity of the burden in the  
18 MRB-QoL, DBI and MRCI may have been different if participants were recruited from  
19 hospitals, nursing homes or patients with more complex medicine regimens.  
20  
21

22 We used a factor based scores approach, which gives equal weighing to each item in obtaining  
23 scores of sub-scales. This approach is simple and scores obtained by this method can be reliably  
24 compared across future studies. However, in the absence of empirical evidence it is not a sound  
25 approach to assume that each item has equal weight in making up a particular sub-scale.  
26 Although strong evidence of ceiling and floor effect has not been observed, a slightly high  
27 ( $>15\%$ )<sup>61</sup> ceiling effect in the “Therapeutic Relationship” and floor effect in the “social burden”  
28 sub-scales were found. Future investigations could therefore include sensitivity and  
29 responsiveness of the MRB-QoL. The initial psychometric testing reported in this paper has set  
30 the ground work for future research to look into additional psychometric testing such as  
31 confirmatory factor analysis, test-retest reliability, sensitivity and responsiveness of the MRB-  
32 QoL. Determining cutoff points for MRB-QoL scores which can be considered as clinically  
33 important difference, and testing the applicability of MRB-QoL in different populations should  
34 also be evaluated.  
35  
36  
37  
38  
39  
40  
41  
42  
43  
44  
45  
46  
47  
48  
49  
50  
51  
52  
53  
54  
55  
56  
57  
58  
59  
60

1  
2  
3 **Conclusions:** The MRB-QoLV.1 has good construct validity and internal consistency reliability.  
4  
5 The MRB-QoL tool may be a useful humanistic measure for evaluation of the impact of  
6  
7 pharmaceutical care interventions on patients' quality of life. Future research is warranted to  
8  
9 further examine other psychometric properties of MRB-QoL V.1 and its utility in patient care.  
10

11  
12 **Acknowledgments** The authors thank the Survey Sampling International (SSI) research  
13  
14 company for conducting online survey of MRB-QoL and all the study participants.  
15

16  
17 **Contributions** MAM contributed to the conception and design, analysis and interpretation,  
18  
19 drafted and reviewed the manuscript. RJM contributed to the design and interpretation, and  
20  
21 reviewed the manuscript. SNH contributed to the interpretation and reviewed the manuscript.  
22  
23 LKO contributed to the interpretation and reviewed the manuscript. TFC contributed to the  
24  
25 conception and design, interpretation and reviewed the manuscript.

26  
27 **Funding** This research received no specific grant from any funding agency in the public,  
28  
29 commercial or not-for-profit sectors.

30  
31 **Competing interest** We declare that we have no competing interests.  
32

33  
34 **Patient consent** obtained. The participants were informed that completing the survey implied the  
35  
36 consent to the study.

37  
38 **Ethics approval** Human Ethics Committee, The University of Sydney (project number:  
39  
40 2016/654).

41  
42 **Provenance and peer review** Not commissioned; externally peer reviewed  
43

44  
45 **Data sharing statement** No additional data are available.

46  
47 The full version of the MRB-QoL V1 is available from MAM (mmoh2116@uni.sydney.edu.au)  
48  
49 and TFC (timothy.chen@sydney.edu.au) on request.  
50

51  
52 **Figure 1: Development and validation process of the MRB-QoL tool.**

53  
54 **Supplementary file 1: Conceptual model of MRB-QoL (doc).**

55  
56 **Supplementary file 2: Conversion of the MRB-QoL scores (doc).**  
57  
58  
59  
60



1  
2  
3  
4  
5  
6  
7  
8  
9  
10  
11  
12  
13  
14  
15  
16  
17  
18  
19  
20  
21  
22  
23  
24  
25  
26  
27  
28  
29  
30  
31  
32  
33  
34  
35  
36  
37  
38  
39  
40  
41  
42  
43  
44  
45  
46  
47  
48  
49  
50  
51  
52  
53  
54  
55  
56  
57  
58  
59  
60

For peer review only

## References

1. Mohammed MA, Moles RJ, Chen TF. Medication-related burden and patients' lived experience with medicine: a systematic review and metasynthesis of qualitative studies. *BMJ Open* 2016;6(2). e010035.
2. Wallace E, Salisbury C, Guthrie B, et al. Managing patients with multimorbidity in primary care. *BMJ* 2015;350:h176.
3. Matthe M, Murawski JPB. Pharmaceutical Therapy-Related Quality of Life: Conceptual Development. *J Soc Adm Pharm* 2001;18(1):2-14.
4. Krska J, Morecroft CW, Poole H, et al. Issues potentially affecting quality of life arising from long-term medicines use: a qualitative study. *Int J Clin Pharm* 2013;35(6):1161-9.
5. Tran V-T, Barnes C, Montori VM, et al. Taxonomy of the burden of treatment: a multi-country web-based qualitative study of patients with chronic conditions. *BMC Medicine* 2015;13(1): 115–115. 111p.
6. Sav A, Kendall E, McMillan SS, et al. 'You say treatment, I say hard work': treatment burden among people with chronic illness and their carers in Australia. *Health Soc Care Community* 2013;21(6):665-74.
7. Hepler CD, Strand LM. Opportunities and responsibilities in pharmaceutical care. *Am J Hosp Pharm* 1990;47(3):533-43.
8. Kheir NM, van Mil JW, Shaw JP, et al. Health-related quality of life measurement in pharmaceutical care. Targeting an outcome that matters. *Pharm World Sci* 2004;26(3):125-8.
9. Alldred DP, Raynor DK, Hughes C, et al. Interventions to optimise prescribing for older people in care homes. *Cochrane database Syst Rev* 2013; 28(2):Cd009095.
10. de Lyra DP, Kheir N, Abriata JP, et al. Impact of Pharmaceutical Care interventions in the identification and resolution of drug-related problems and on quality of life in a group of elderly outpatients in Ribeirao Preto (SP), Brazil. *Ther Clin Risk Manag* 2007;3(6):989-98.
11. Gourley GA, Portner TS, Gourley DR, et al. Humanistic outcomes in the hypertension and COPD arms of a multicenter outcomes study. *J Am Pharm Assoc (Wash)* 1998;38(5):586-97.

12. Bladh L, Ottosson E, Karlsson J, et al. Effects of a clinical pharmacist service on health-related quality of life and prescribing of drugs: a randomised controlled trial. *BMJ Qual & Saf* 2011;20(9):738-46.
13. Kheir N, Emmerton L, Shaw J. Can pharmacists influence the health-related quality of life of patients with asthma?: The New Zealand Pharmaceutical Care experience. *J Sci Res Med Sci* 2001;3(2):69-75.
14. Schulz M, Verheyen F, Muhlig S, et al. Pharmaceutical care services for asthma patients: a controlled intervention study. *J Clin Pharmacol* 2001;41(6):668-76.
15. Isetts BJ, Schondelmeyer SW, Heaton AH, et al. Effects of collaborative drug therapy management on patients' perceptions of care and health-related quality of life. *Res Social Adm Pharm* 2006;2(1):129-42.
16. Pinto SL, Kumar J, Partha G, et al. Pharmacist-provided medication therapy management (MTM) program impacts outcomes for employees with diabetes. *Popul Health Manag* 2014;17(1):21-7.
17. Mohammed MA, Moles RJ, Chen TF. Impact of Pharmaceutical Care Interventions on Health-Related Quality-of-Life Outcomes: A Systematic Review and Meta-analysis. *Ann Pharmacother* 2016;50(10):862-81.
18. Viswanathan M, Kahwati LC, Golin CE, et al. Medication therapy management interventions in outpatient settings: a systematic review and meta-analysis. *JAMA Intern Med* 2015;175(1):76-87.
19. Malone DC, Carter BL, Billups SJ, et al. Can clinical pharmacists affect SF-36 scores in veterans at high risk for medication-related problems? *Med Care* 2001;39(2):113-22.
20. Holland R, Desborough J, Goodyer L, et al. Does pharmacist-led medication review help to reduce hospital admissions and deaths in older people? A systematic review and meta-analysis. *Br J Clin Pharmacol* 2008;65(3):303-16.
21. Jarab AS, Alqudah SG, Khmour M, et al. Impact of pharmaceutical care on health outcomes in patients with COPD. *Int J Clin Pharm* 2012;34(1):53-62.
22. Volume CI, Farris KB, Kassam R, et al. Pharmaceutical care research and education project: patient outcomes. *J Am Pharm Assoc (Wash)* 2001;41(3):411-20.

23. Mohammed MA, Rebekah J Moles, Timothy F Chen. Content analysis of Health-Related Quality of Life (HRQoL) measures used in Pharmaceutical Care studies: a period of 1990 to 2015. *Int Journal CI Pharm* 2017 (In press)
24. Pickard AS, Hung SY. An update on evidence of clinical pharmacy services' impact on health-related quality of life. *Ann Pharmacother* 2006;40(9):1623-34.
25. Pickard AS, Johnson JA, Farris KB. The impact of pharmacist interventions on health-related quality of life. *Ann Pharmacother* 1999;33(11):1167-72.
26. Hilmer SN, Mager DE, Simonsick EM, et al. A drug burden index to define the functional burden of medications in older people. *Arch Intern Med* 2007;167(8):781-7.
27. George J, Phun YT, Bailey MJ, et al. Development and validation of the medication regimen complexity index. *Ann Pharmacother* 2004;38(9):1369-76.
28. Tabachnick Barbara G and Fidell Linda S, eds. *Using multivariate statistics*. 5th ed. Boston: Allyn and Bacon; 2007: 345-436.
29. Bryant FB, Yarnold PR. Principal components analysis and exploratory and confirmatory factor analysis. In: Grimm LG, Yarnold PR, eds. *Reading and Understanding Multivariate Statistics*. Washington, DC: APA; 1995:99–136.
30. Pedhazur EJ, Schmelkin LP. *Measurement, Design, and Analysis*. Hillsdale, NJ: Lawrence Erlbaum Associates; 1991
31. Pett MA, Lackey NR, Sullivan JJ. *Making Sense of Factor Analysis*. Thousand Oaks, CA: Sage Publications; 2003.
32. Cronbach L: Coefficient alpha and the internal structure of tests. *Psychometrika* 1951, 16(3):297-334.
33. Cohen, J. *Statistical power analysis for the behavioral sciences* (2nd ed.). Hillsdale, NJ: Lawrence Erlbaum Associates; 1988.
34. Gnjidic D, Hilmer SN, Blyth FM, et al. Polypharmacy cutoff and outcomes: five or more medicines were used to identify community-dwelling older men at risk of different adverse outcomes. *J Clin Epidemiol* 2012;65(9):989-95.
35. Mavaddat N, Valderas JM, van der Linde R, et al. Association of self-rated health with multimorbidity, chronic disease and psychosocial factors in a large middle-aged and older cohort from general practice: a cross-sectional study. *BMC Fam Prac* 2014;15:185.

- 1  
2  
3 36. Fortin M, Hudon C, Haggerty J, et al. Prevalence estimates of multimorbidity: a comparative  
4 study of two sources. *BMC Health Serv Res* 2010;10:111.
- 5  
6  
7 37. Harrison C, Britt H, Miller G, et al. Examining different measures of multimorbidity, using a  
8 large prospective cross-sectional study in Australian general practice. *BMJ Open*  
9 2014;4(7):e004694.
- 10  
11  
12 38. Lowe DB, Taylor MJ, Hill SJ. Cross-sectional examination of musculoskeletal conditions  
13 and multimorbidity: influence of different thresholds and definitions on prevalence and  
14 association estimates. *BMC Res Notes* 2017;10(1):51.
- 15  
16  
17 39. van den Bussche H, Koller D, Kolonko T, et al. Which chronic diseases and disease  
18 combinations are specific to multimorbidity in the elderly? Results of a claims data based  
19 cross-sectional study in Germany. *BMC Public Health* 2011;11:101.
- 20  
21  
22 40. Best O, Gnjjidic D, Hilmer SN, et al. Investigating polypharmacy and drug burden index in  
23 hospitalised older people. *Intern Med J* 2013;43(8):912-8.
- 24  
25  
26 41. Gnjjidic D, Cumming RG, Le Couteur DG, et al. Drug Burden Index and physical function in  
27 older Australian men. *Br J Clin Pharmacol* 2009;68(1):97-105.
- 28  
29  
30 42. Nunnally JO: Psychometric theory. New York , McGraw-Hill; 1978.
- 31  
32 43. Demain S, Goncalves AC, Areia C, et al. Living with, managing and minimising treatment  
33 burden in long term conditions: a systematic review of qualitative research. *PloS One*  
34 2015;10(5):e0125457.
- 35  
36  
37 44. Rosbach M, Andersen JS. Patient-experienced burden of treatment in patients with  
38 multimorbidity - A systematic review of qualitative data. *PloS One* 2017;12(6):e0179916.
- 39  
40 45. Sav A, King MA, Whitty JA, et al. Burden of treatment for chronic illness: a concept analysis  
41 and review of the literature. *Health Expec* 2015;18(3): 312-24..
- 42  
43  
44 46. Sakthong P, Suksanga P, Sakulbumrungsil R, et al. Development of Patient-reported  
45 Outcomes Measure of Pharmaceutical Therapy for Quality of Life (PROMPT-QoL): A  
46 novel instrument for medication management. *Res Social Adm Pharm* 2015;11(3):315-  
47 38.
- 48  
49  
50 47. Tseng HM, Lee CH, Chen YJ, et al. Developing a measure of medication-related quality of  
51 life for people with polypharmacy. *Qual Life Res* 2016;25(5):1295-302.
- 52  
53  
54  
55  
56  
57  
58  
59  
60

- 1  
2  
3  
4  
5  
6  
7  
8  
9  
10  
11  
12  
13  
14  
15  
16  
17  
18  
19  
20  
21  
22  
23  
24  
25  
26  
27  
28  
29  
30  
31  
32  
33  
34  
35  
36  
37  
38  
39  
40  
41  
42  
43  
44  
45  
46  
47  
48  
49  
50  
51  
52  
53  
54  
55  
56  
57  
58  
59  
60
48. Tran VT, Harrington M, Montori VM, et al. Adaptation and validation of the Treatment Burden Questionnaire (TBQ) in English using an internet platform. *BMC Med* 2014;12:109.
  49. Eton DT, Yost KJ, Lai JS, et al. Development and validation of the Patient Experience with Treatment and Self-management (PETS): a patient-reported measure of treatment burden. *Qual Life Res* 2017; 26(3):489-503.
  50. Tran VT, Montori VM, Eton DT, et al. Development and description of measurement properties of an instrument to assess Treatment Burden among patients with multiple chronic conditions. *BMC Med* 2012;10:68.
  51. Krska J, Katusiime B, Corlett SA. Validation of an instrument to measure patients' experiences of medicine use: the Living with Medicines Questionnaire. *Patient Prefer Adherence* 2017;11:671-79.
  52. Gnjjidic D, Bell JS, Hilmer SN, et al. Drug Burden Index associated with function in community-dwelling older people in Finland: a cross-sectional study. *Ann Med* 2012;44(5):458-67.
  53. Hilmer SN, Mager DE, Simonsick EM, et al. Drug burden index score and functional decline in older people. *Am J Med* 2009;122(12):1142-49.e1-2.
  54. Lowry E, Woodman RJ, Soiza RL, et al. Drug burden index, physical function, and adverse outcomes in older hospitalized patients. *J Clin Pharmacol* 2012;52(10):1584-91.
  55. Kouladjian L, Gnjjidic D, Chen TF, et al. Drug Burden Index in older adults: theoretical and practical issues. *Clin Interv Aging* 2014;9:1503-15.
  56. Lalic S, Jamsen KM, Wimmer BC, et al. Polypharmacy and medication regimen complexity as factors associated with staff informant rated quality of life in residents of aged care facilities: a cross-sectional study. *Eur J Clin Pharmacol* 2016;72(9):1117-24.
  57. Lees J. Management of polypharmacy in older cancer patients. *Cancer Forum* 2013; 37:230–233.
  58. Turner JP, Jamsen KM, Shakib S, et al. Polypharmacy cut-points in older people with cancer: how many medications are too many? *Support Care Cancer* 2016;24(4):1831-40.
  59. Hart A. Mann-Whitney test is not just a test of medians: differences in spread can be important. *BMJ* 2001;323(7309):391-93.

- 1  
2  
3 60. Wiering B, de Boer D, Delnoij D. Patient involvement in the development of patient-reported  
4 outcome measures: a scoping review. *Health Expect* 2017;20(1):11-23.  
5  
6  
7 61. Terwee CB, Bot SD, de Boer MR, et al. Quality criteria were proposed for measurement  
8 properties of health status questionnaires. *J Clin Epidemiol* 2007;60(1):34-42.  
9  
10  
11  
12  
13  
14  
15  
16  
17  
18  
19  
20  
21  
22  
23  
24  
25  
26  
27  
28  
29  
30  
31  
32  
33  
34  
35  
36  
37  
38  
39  
40  
41  
42  
43  
44  
45  
46  
47  
48  
49  
50  
51  
52  
53  
54  
55  
56  
57  
58  
59  
60

For peer review only

1  
2  
3  
4  
5  
6  
7  
8  
9  
10  
11  
12  
13  
14  
15  
16  
17  
18  
19  
20  
21  
22  
23  
24  
25  
26  
27  
28  
29  
30  
31  
32  
33  
34  
35  
36  
37  
38  
39  
40  
41  
42  
43  
44  
45  
46  
47  
48  
49  
50  
51  
52  
53  
54  
55  
56  
57  
58  
59  
60

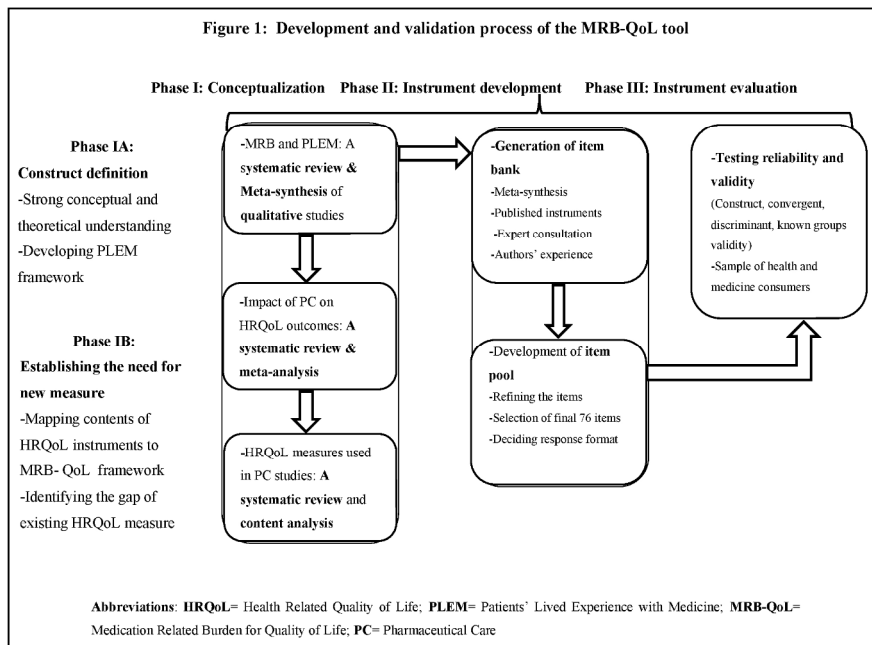

215x279mm (300 x 300 DPI)



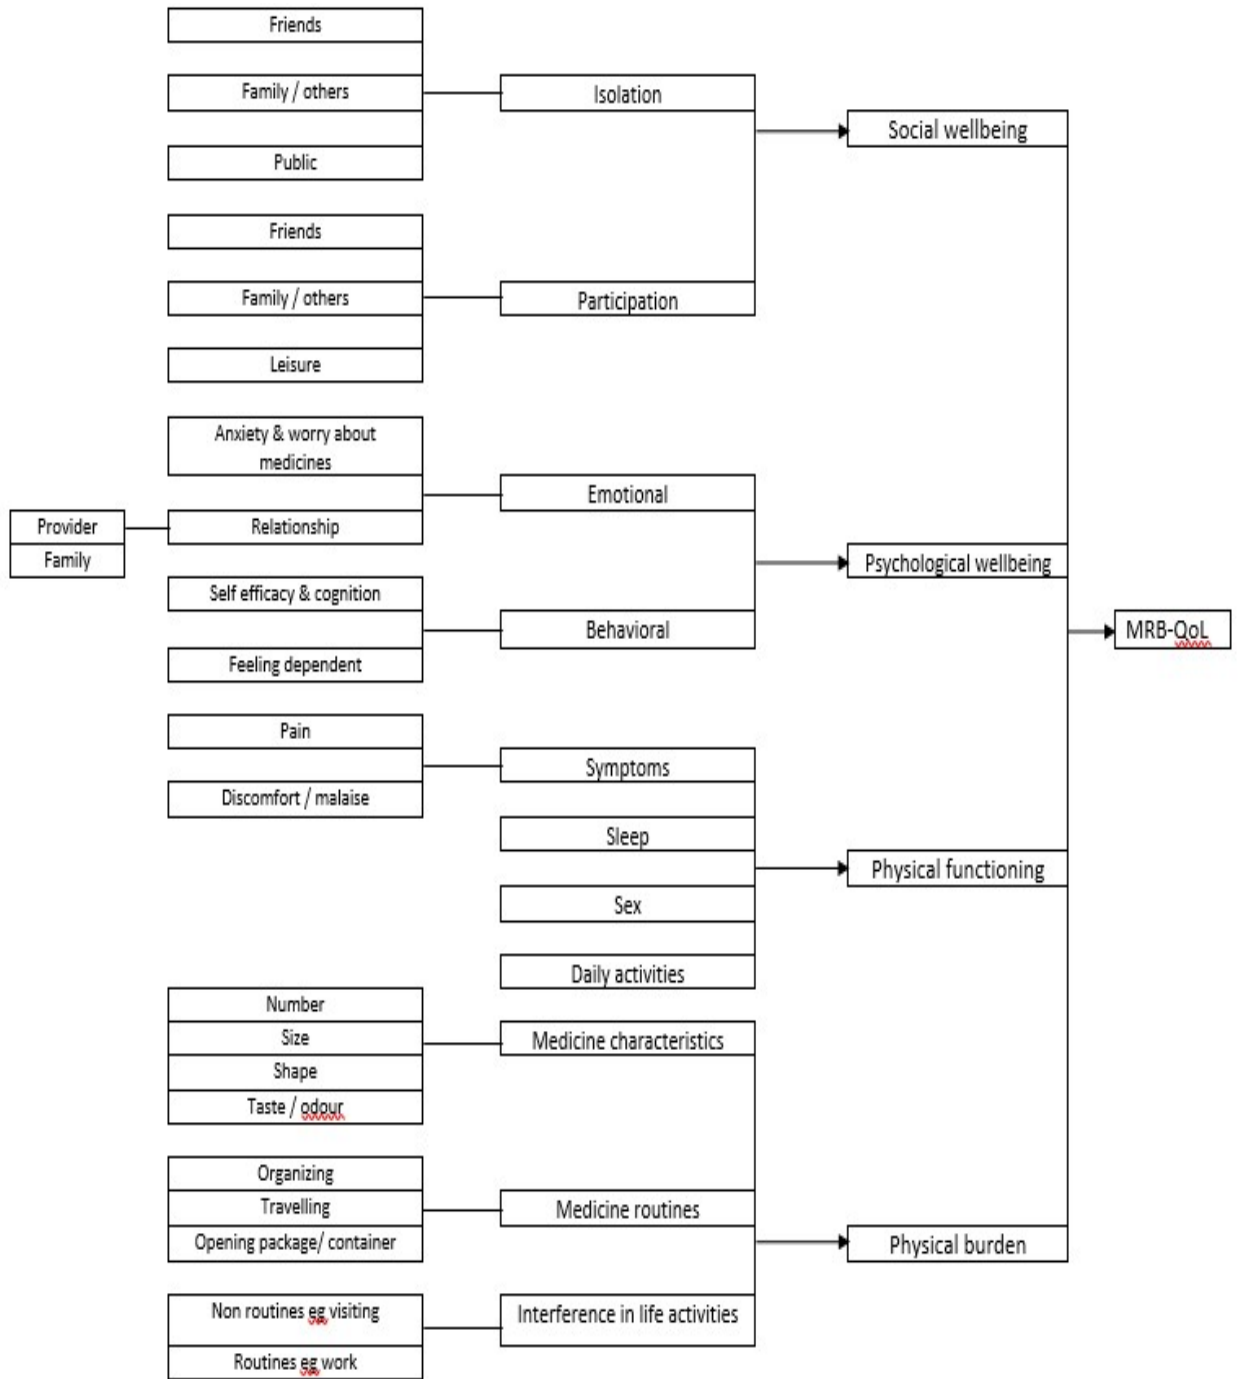

Supplementary file 1: Conceptual model of Medication-Related Burden for Quality of Life (MRB-QoL)

### Supplementary file 2: Conversion of the MRB-QoL scores

We proposed the below conversion formula for practitioners and researchers to help them quantify the total burden. Depending on the context and research questions, either selected sub-scale/s or the overall score can be used and computed. The score ranges from 0 to 100, where, 0 indicates no medication related burden and thus, best possible medication related quality of life. In contrast, 100 indicates the highest level of burden and thus, the worst possible medication related quality of life. However, further evaluation is required in order to determine the cutoff points for MRB-QoL no impact, moderate impact or highest impact on quality of life.

#### Conversion formula for MRB-QoL score

$$\text{Total MRB-QoL score} = \frac{\text{Total actual raw score of each item} - \text{number of items in the sub-scale}}{\text{Maximum possible raw score of all items} - \text{number of items in the sub-scale}} \times 100$$

The score ranges from 0 to 100, where,

0 = no medication related burden and thus, best possible medication related quality of life

100 = highest level of medication related burden and thus, the worst possible medication related quality of life
