# Supplementary figures and images for: Development and validation of an instrument for measuring the burden of medicine on functioning and well-being: the Medication-Related Burden Quality of Life (MRB-QoL) tool
Source: PubMed Central journal article supplement — BMJ Open. 2018 Jan 11;8(1):e018880. doi: 10.1136/bmjopen-2017-018880 (PMC5781060; doi:10.1136/bmjopen-2017-018880), 2018-01-11

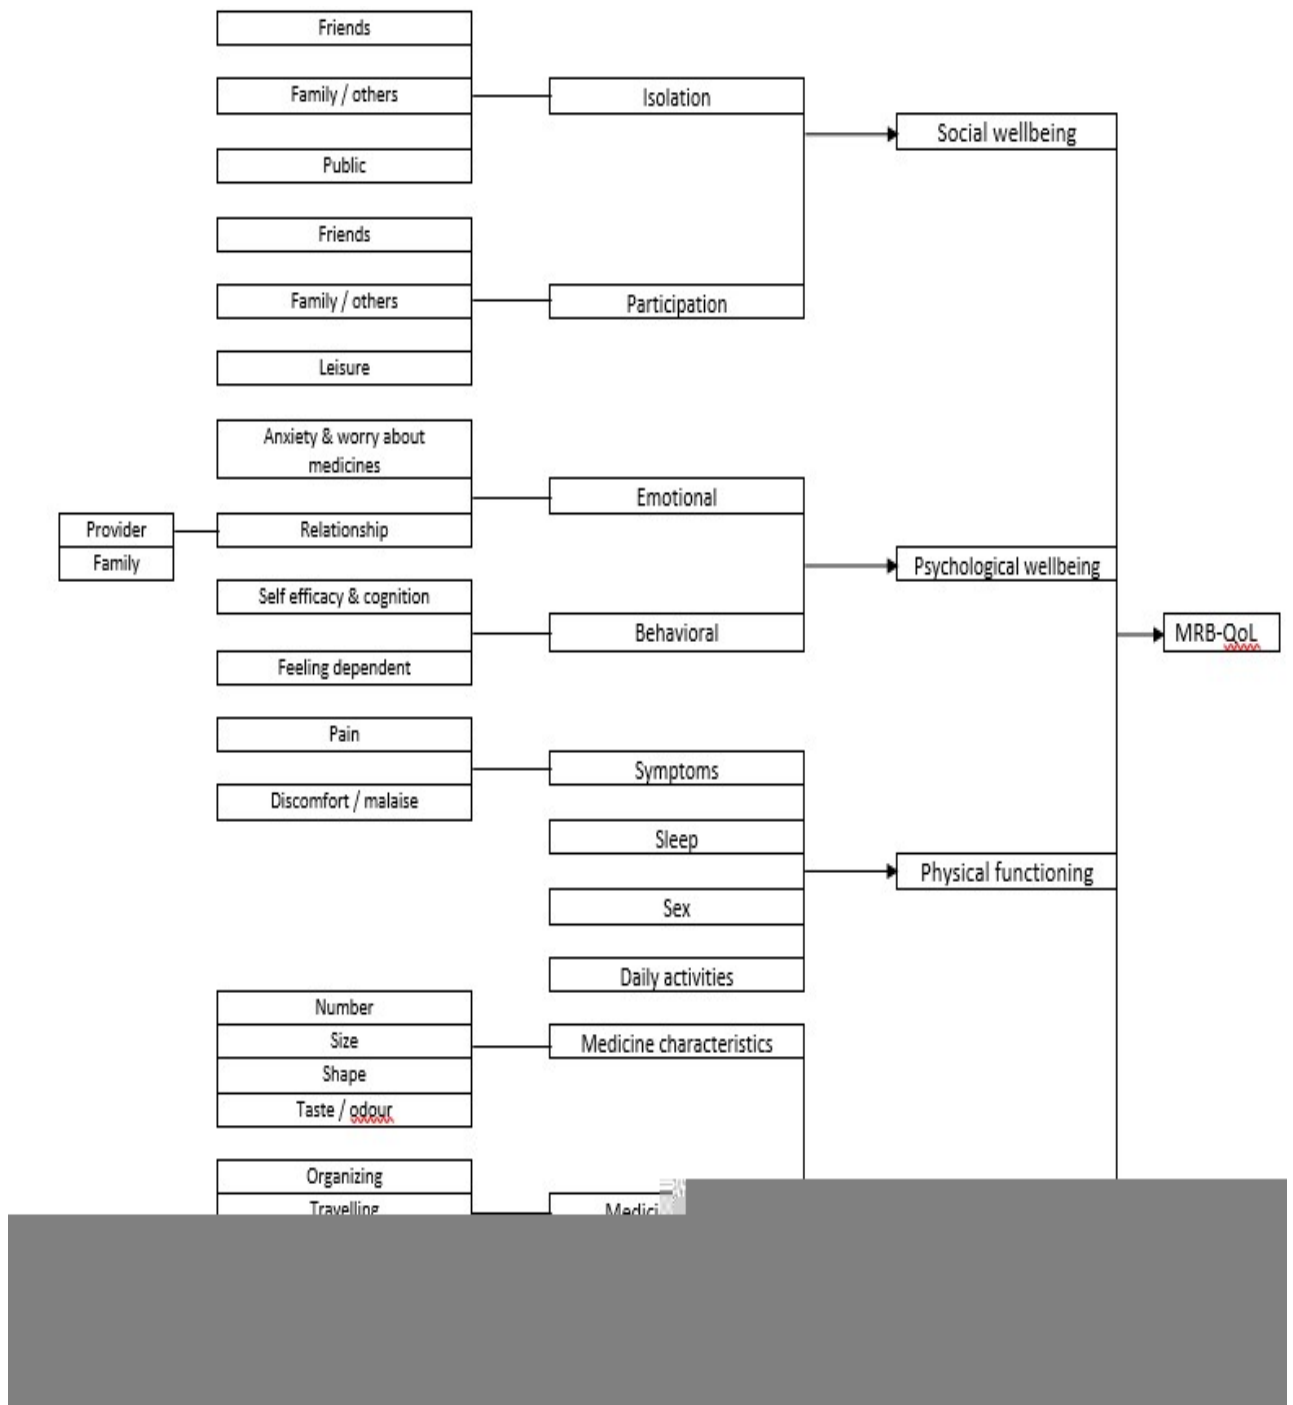

**Supplementary file 1:**  
Y } > •

}v % š μ o u } o } ( D ] š } vrZ o š μ Œ v ( ) Œ Y μ o ] š Œ

Supplement: bmjopen-2017-018880supp001.pdf [file bmjopen-2017-018880supp001.pdf]
